1 **Organization, genomic targeting and assembly of three distinct SWI/SNF**  
2 **chromatin remodeling complexes in *Arabidopsis***

3

4 Wei Fu<sup>1,#</sup>, Yaoguang Yu<sup>1,#</sup>, Jie Shu<sup>2,3</sup>, Zewang Yu<sup>1</sup>, Tao Zhu<sup>1</sup>, Yixiong Zhong<sup>1</sup>, Zhihao  
5 Zhang<sup>1</sup>, Zhenwei Liang<sup>1</sup>, Yuhai Cui<sup>4</sup>, Chen Chen<sup>2,3</sup>, Chenlong Li<sup>1\*</sup>

6

7 <sup>1</sup> State Key Laboratory of Biocontrol and Guangdong Key Laboratory of Plant  
8 Resources, School of Life Sciences, Sun Yat-sen University, Guangzhou, 510275,  
9 China.

10 <sup>2</sup> Key Laboratory of South China Agricultural Plant Molecular Analysis and Genetic  
11 Improvement & Guangdong Provincial Key Laboratory of Applied Botany, South  
12 China Botanical Garden, Chinese Academy of Sciences, Guangzhou, Guangdong,  
13 510650, China

14 <sup>3</sup> University of the Chinese Academy of Sciences, Beijing, 100049, China

15 <sup>4</sup> London Research and Development Centre, Agriculture and Agri-Food Canada,  
16 London, Ontario, N5V 4T3 Canada

17 # These authors contributed equally to this work

18 \* Corresponding author: Chenlong Li ([lichlong3@mail.sysu.edu.cn](mailto:lichlong3@mail.sysu.edu.cn))

19

20 The author(s) responsible for distribution of materials integral to the findings presented  
21 in this article in accordance with the policy described in the Instructions for Authors  
22 (<https://academic.oup.com/plcell/pages/General-Instructions>) is: Chenlong Li  
23 ([lichlong3@mail.sysu.edu.cn](mailto:lichlong3@mail.sysu.edu.cn)).

24

25 **Short title:** *Arabidopsis* SWI/SNF chromatin remodeling complexes

26

27 **One-sentence summary:** Comprehensively define the organization, genomic targeting  
28 and assembly of three distinct SWI/SNF chromatin remodeling complexes in  
29 *Arabidopsis*

30

31 **Abstract**

32 Switch defective/sucrose non-fermentable (SWI/SNF) complexes are evolutionarily  
33 conserved multi-subunit machines that play vital roles in chromatin architecture  
34 regulation for modulating gene expression via sliding or ejection of nucleosomes in  
35 eukaryotes. In plants, perturbations of SWI/SNF subunits often result in severe  
36 developmental disorders. However, the subunit composition, pathways of assembly,  
37 and genomic targeting of the plant SWI/SNF complexes remain undefined. Here, we  
38 reveal the organization, genomic targeting and assembly of three distinct Arabidopsis  
39 SWI/SNF complexes: BRAHMA-Associated SWI/SNF complexes (BAS), SPLAYED-  
40 Associated SWI/SNF complexes (SAS) and MINUSCULE-Associated SWI/SNF  
41 complexes (MAS). We show that BAS complexes are equivalent to human ncBAF,  
42 whereas SAS and MAS complexes evolve in multiple subunits unique to plants,  
43 suggesting a plant-specific functional evolution of SWI/SNF complexes. We further  
44 demonstrate overlapping and specific genomic targeting of the three plant SWI/SNF  
45 complexes on chromatin and reveal that SAS complexes are necessary for the correct  
46 genomic localization of the BAS complexes. Finally, we define the role of core module  
47 subunit in the assembly of the plant SWI/SNF complexes and highlight that ATPase  
48 module subunit is required for global complex stability and the interaction of core  
49 module subunits in SAS and BAS complexes in Arabidopsis. Together, our work  
50 highlights the divergence of SWI/SNF chromatin remodelers during the eukaryote  
51 evolution and provides a comprehensive landscape for understanding the plant  
52 SWI/SNF complexes organization, assembly, genomic targeting, and function.

53

54 **Keywords:** SWI/SNF complexes, Chromatin remodeling, BRAHMA, SAS, MAS,  
55 BAS, *Arabidopsis*

56

57

58

59

60

## 61 **Introduction**

62 Switch defective/sucrose non-fermentable (SWI/SNF) complexes are chromatin  
63 remodelers that play essential roles in modulating chromatin architecture to enable  
64 DNA accessibility and gene expression in an ATP-hydrolysis-dependent manner  
65 (Clapier and Cairns, 2009; Ho and Crabtree, 2010; Hargreaves and Crabtree, 2011;  
66 Ryan and Owen-Hughes, 2011; Clapier et al., 2017). These complexes are multi-  
67 subunit machineries, including one ATPase catalytic subunit and multiple additional  
68 regulatory core subunits, evolutionally conserved among yeasts, animals and plants (Ho  
69 and Crabtree, 2010; Sarnowska et al., 2016). In *Saccharomyces cerevisiae*, there are  
70 two sub-families of SWI/SNF remodelers, Swi/Snf and RSC. The yeast Swi/Snf  
71 complex consists of 12 proteins, which was the first chromatin remodeler discovered  
72 (Smith et al., 2003; Dutta et al., 2017), whereas the RSC complex is composed of 16  
73 proteins (Wagner et al., 2020). The two sub-complexes contain three common  
74 subunits, ARP7/9 and Rtt102, and the other subunits are specialized in the two sub-  
75 complexes (Dutta et al., 2017; Wagner et al., 2020). In humans, the subunits of  
76 SWI/SNF complexes are combinatorially assembled into three classes of complexes:  
77 canonical BAF (cBAF), polybromo-associated BAF (PBAF), and non-canonical BAF  
78 (ncBAF) (Gatchalian et al., 2018; Mashtalir et al., 2018). These three SWI/SNF sub-  
79 complexes share a set of core subunits, such as SMARCA2/SMARCA4, SMARCC1/2,  
80 SMARCD, ACTL6A/B, and BCL7A/B/C, but are distinguished by the inclusion of  
81 subtype-specific ones: i.e., DPF1, DPF2, ARID1A, and ARID1B for cBAF; PBRM1,  
82 PHF10, ARID2, and BRD7 for PBAF; and BRD9 and GLTSCR1/1L for ncBAF  
83 (Gatchalian et al., 2018; Mashtalir et al., 2018).

84 In the flowering plant *Arabidopsis thaliana*, through genetic and molecular studies,  
85 a number of SWI/SNF subunits have been identified, including four ATPases  
86 (BRAHMA (BRM), SPLAYED (SYD), MINUSCULE 1 (MINU1), and MINU2; four  
87 SWI3 subunits (SWI3A-SWI3D); two SWI/SNF associated proteins 73 (SWP73A and  
88 SWP73B); two actin-related proteins (ARP4 and ARP7); a single SNF5 subunit called  
89 BUSHY (BSH); an ARID paralog LEAF AND FLOWER RELATED (LFR) (Wagner  
90 D, 2002; Farrona et al., 2004; Hurtado et al., 2006; Mlynarova et al., 2007; Wang et al.,

91 2009; Sang et al., 2012). In addition, we recently biochemically isolated novel subunits  
92 of the BRM-containing SWI/SNF complexes in Arabidopsis, including two BRM-  
93 interacting proteins (BRIP1 and BRIP2) and three bromodomain-containing proteins,  
94 BRD1, BRD12, and BRD13 (Yu et al., 2020; Yu et al., 2021). More recently, MINU-  
95 containing SWI/SNF complexes were also reported (Diego-Martin et al., 2022). Plant  
96 SWI/SNF subunits serve critical roles in cell differentiation, development, and response  
97 to various environmental signals, and their mutations result in severe defects in leaf  
98 development, root stem cell maintenance, flower patterning and timing, embryo  
99 development, and vegetative to adult phase transition (Sarnowski et al., 2005; Ho and  
100 Crabtree, 2010; Li et al., 2015; Wu et al., 2015; Yang et al., 2015; Zhao et al., 2015;  
101 Sarnowska et al., 2016; Xu et al., 2016). However, owing in large part to limitations in  
102 understanding plant SWI/SNF subunit composition, the mechanisms by which these  
103 mutations alter plant SWI/SNF complexes function on chromatin and subsequently lead  
104 to impaired development and responses to environmental stimulus remain unknown.  
105 Particularly, how many different types of SWI/SNF sub-complexes are presented in  
106 plants and the subunit composition of each sub-complexes is unclear. Finally, how the  
107 activities and genomic targeting of different SWI/SNF subtypes are coordinated with  
108 each other to regulate chromatin structure and gene expression is also poorly  
109 understood.

110 Another significant barrier to our mechanistic understanding of the functions of  
111 SWI/SNF complexes lies in the need for more information regarding the role of each  
112 subunit in complex assembly. Recent studies have begun to reveal the assembly steps  
113 of the subunits of SWI/SNF complexes. It was reported that mammalian SWI/SNF  
114 complex assembly is triggered by the formation of the initial BAF core that is composed  
115 of two SMARCC and one SMARCD subunits. This initial core then acts as a platform  
116 for independent docking of the subcomplex-specific subunits to form the core module.  
117 Finally, the core module recruits the ATPase SMARCA2/4 to finalize complex  
118 assembly (Gatchalian et al., 2018; Mashtalir et al., 2018). In line with this model, the  
119 removal of core module subunits SMAECCs resulted in near-complete degradation of  
120 all three SWI/SNF complexes components, whereas removal of the ATPase module

121 does not disrupt the formation of the core module (Mashtalir et al., 2018; Michel et al.,  
122 2018; Pan et al., 2019). Thus, the core module is required for assembly toward fully  
123 formed SWI/SNF complexes in mammalian, but the ATPase module is the last to be  
124 incorporated into SWI/SNF complexes and, therefore, not necessary for the core  
125 module assembly in mammals (Mashtalir et al., 2018; Michel et al., 2018; Pan et al.,  
126 2019). In *Arabidopsis*, our recent studies showed that BRIP1/2 and BRD1/2/13, the  
127 homologs of human ncBAF core module subunits GLTSCR1/1L and BRD9, are  
128 required for the assembly of SWI/SNF complexes (Yu et al., 2020). However, whether  
129 plant ATPases use the same strategy as their mammalian counterparts or a different one  
130 for complex assembly and thus the underlying mechanisms are still unknown.

131 In this study, we examined the organization, genomic targeting, and assembly of  
132 the three non-redundant final form *Arabidopsis* SWI/SNF complexes: BRAHMA-  
133 Associated SWI/SNF complexes (BAS), SPLAYED-Associated SWI/SNF complexes  
134 (SAS) and MINUSCULE-Associated SWI/SNF complexes (MAS). BAS complexes  
135 are equivalent to human ncBAF, whereas SAS and MAS complexes evolve in multiple  
136 subunits unique to plants, suggesting a plant-specific functional evolution of SWI/SNF  
137 complexes. We further demonstrate both overlapping and specific genomic targeting of  
138 the three plant SWI/SNF complexes on chromatin and reveal a requirement of SAS  
139 complexes for the correct genomic localization of the BAS complexes. Finally, by  
140 focusing on the SAS and BAS complexes, we define the role of core module subunit in  
141 the assembly of the plant SWI/SNF complexes and unexpectedly establish that ATPase  
142 module subunit (SYD and BRM) is required for the stability and interaction of core  
143 module subunits in SAS and BAS complexes in *Arabidopsis*. Together, these studies  
144 highlight the divergence of SWI/SNF chromatin remodelers during the eukaryote  
145 evolution and lay the groundwork for comprehensive understanding the plant SWI/SNF  
146 complexes organization, assembly, genomic targeting, and function.

147

## 148 **Results**

### 149 ***Arabidopsis* has three biochemically distinct SWI/SNF sub-complexes**

150 To comprehensively define the potential plant SWI/SNF sub-complexes, their subunits

151 organization and assembly, we started by performing immuno-purification followed by  
152 mass spectrometry analysis (IP-MS) using stable transgenic *Arabidopsis* lines that  
153 expressed a green fluorescent protein (GFP)-tagged ATPase subunit, BRM (Li et al.,  
154 2016), SYD (Shu et al., 2021) or MINU2 (this study), driven by its native promoter in  
155 corresponding null mutant background. This analysis revealed that the three ATPases  
156 were constituted into three distinct sub-assemblies (Figure 1 A-B, and Supplemental  
157 Figure S1, A-C). Specifically, we found that the BRM-containing complexes uniquely  
158 lack core, evolutionarily conserved ARID paralog, LFR, incorporate selective paralogs  
159 (that is, SWI3C but not SWI3A/B/D, and SWP73A) and contain a set of complex-  
160 specific subunits that are not shared by SYD- or MINU-complex, the GLTSCR1/1L  
161 paralogs (BRIP1/2) and BRD1/2/13. In contrast, the SYD-containing complexes  
162 selectively contain paralog SWI3D but not SWI3A/B/C, and include a complex-  
163 specific subunit, encoded by *SYD sub-SWI/SNF Interacting Protein 1/2/3* (*SSIP1*,  
164 *SSIP2*, or *SSIP3*). Finally, consistent with the recent report (Diego-Martin et al., 2022),  
165 the MINU-containing complexes do not contain the GIF2 subunit (SS18 paralogs)  
166 found in both BRM- and SYD-containing complexes, incorporate selective paralogs  
167 (that is, SWI3A/B but not SWI3C and SWI3D) and include a number of complex-  
168 specific subunits, including BSH, BRD5, SHH2, TPF1/2, OPF1/2, PSA1, and PSA2.

169 To further confirm the three distinct SWI/SNF sub-complexes in *Arabidopsis*, we  
170 generated transgenic lines stably expressing GFP-tagged subunits specific to the BRM-  
171 complexes, the SYD-complexes, or the MINU-complexes or subunits shared by the  
172 three sub-complexes. We then identified proteins that co-purified with each subunit by  
173 mass spectrometry. Silver staining of proteins isolated from transgenic lines stably  
174 expressing GFP-tagged SWI3C, SWI3D and SWI3A again demonstrated three distinct  
175 SWI/SNF sub-complexes in *Arabidopsis* (Figure 1C and Supplemental Figure S1D).  
176 Furthermore, mass-spectrometry showed that SWI3C, BRIP2, BRD1, and SWP73A  
177 immunoprecipitation enriched the identical subunits immunoprecipitated by BRM,  
178 whereas none of the SYD-specific or MINU-specific subunits were co-  
179 immunoprecipitated, indicating that they are unique components to the BRM-  
180 containing complexes (Figure 1B and Supplemental Figure S1E). Likewise, the

181 immunoprecipitation of SYD-specific or MINU-specific subunits did not catch  
182 subunits unique to the other two subcomplexes (Figure 1B and Supplemental Figure  
183 S1E). In contrast, SWP73B and BCL7B, the shared subunits by the three sub-  
184 complexes, immunoprecipitated all the subunits found in the three sub-complexes  
185 (Figure 1B and Supplemental Figure S1E). Together, these immunoprecipitation data  
186 demonstrate the existence of three concurrently-expressed plant SWI/SNF family sub-  
187 complexes that have specific subunits and are separately assembled on a mutually  
188 exclusive catalytic subunit, BRM, SYD, or MINUs. We therefore termed these three  
189 plant SWI/SNF sub-complexes as BAS (BRM-associated SWI/SNF complex), SAS  
190 (SYD-associated SWI/SNF complex), and MAS (MINU-associated SWI/SNF  
191 complex), respectively (Figure 1C).

192

### 193 **Comparison of SWI/SNF sub-complexes among yeast, human and Arabidopsis**

194 SWI/SNF complexes are multi-protein machineries evolutionally conserved among  
195 yeasts, animals, and plants (Ho and Crabtree, 2010; Sarnowska et al., 2016). We  
196 compared the three distinct plant SWI/SNF complexes with the mammalian SWI/SNF  
197 complexes and identified several plant-specific properties in SWI/SNF complexes. First,  
198 in humans, the three different types of SWI/SNF sub-complexes, BAF, PBAF and  
199 ncBAF, shared the same ATPases (BRM/BRG1) and initial BAF core subunits (two  
200 SMARCC and one SMARCD). However, in *Arabidopsis*, SAS, MAS and BAS each  
201 used different ATPases and SMARCCs homologs. Specifically, the SAS complex  
202 contained SYD ATPase and SWI3D, the MAS complex included MINU1/2 ATPases  
203 and SWI3A/B, while BRM ATPase and SWI3C specifically presented in the BAS  
204 complex (Figure 2A). Second, plant SWI/SNF complexes uniquely lacked core,  
205 metazoan-conserved subunits such as SMARCE1 and pBRM1, but selectively evolved  
206 in plant-specific subunits that are not found in metazoan and yeast, including PSA1,  
207 PSA2, SHH2, SSIP1, SSIP2, and SSIP3 (Figure 2A). Third, the BAS complexes are  
208 equivalent to the mammalian ncBAF because they contain the identical paralog  
209 subunits (Yu et al., 2020; Yu et al., 2021). However, comparison of the subunit  
210 compositions of the SAS and MAS sub-complexes with those of human BAF

211 complexes suggested that the SAS and MAS are plant-specific. Indeed, SAS complexes  
212 did not contain any PHD domain or bromodomain proteins that are signatures of  
213 mammalian PBAF and cBAF, but had three plant-specific proteins SSIP1/2/3 whose  
214 functions in the SAS remain to be investigated. In terms of MAS complexes, although  
215 they had PHD domain proteins TPF1/2 and OPF1/2 that are homologous to PHF10  
216 subunits in PBAF and DPF1/2/3 in cBAF and contain BRD5 protein that is homologous  
217 to the PBAF-specific subunit BRD7, they lacked homologous subunits of PBRM1 and  
218 SS18, which are specialized subunits in PBAF and cBAF, respectively. In contrast, the  
219 MAS complexes contained several subunits (SHH2, PSA1, and PSA2) that are  
220 specifically presented in plants. Based on these comparisons, we propose that the  
221 SWI/SNF sub-complexes in different kingdoms came from an ancestral BAF complex.  
222 This ancestor BAF complex was firstly evolved into an ncBAF complex that has been  
223 preserved in three kingdoms by integrating the GLTSCR domain-containing subunits.  
224 Meanwhile, the ancestral BAF complex integrated different new subunits and discarded  
225 several original ones to evolve into the PBAF and cBAF sub-complexes in animals and  
226 fungi, as well as two plant-specific sub-complexes, SAS and MAS (Figure 2B).

227

### 228 **Differential localization of the *Arabidopsis* SWI/SNF sub-complexes, SAS, MAS,** 229 **and BAS on chromatin**

230 To further characterize the three distinct plant SWI/SNF assemblies and to determine  
231 whether the differences of their subunit compositions may result in differential genomic  
232 targeting, we performed a comprehensive genome-wide mapping of SAS, MAS and  
233 BAS sub-complexes by performing chromatin immunoprecipitation-sequencing (ChIP-  
234 seq) using the stable expression transgenic plants, including pan-plant-SWI/SNF  
235 subunits (SWP73B and BCL7A/B) and complex specific subunits SYD and SWI3D for  
236 SAS, MINU2, SWI3A and BSH for MAS, and BRM, SWP73A and SWI3C for BAS  
237 (Supplemental Figure S2A). The ChIP-seq data of other BAS-specific subunits  
238 BRIP1/2 and BRD1/2/13 were previously described (Yu et al., 2020; Yu et al., 2021).

239 Consistent with biochemical results, subcomplex-specific subunits peaks  
240 comprised subsets of all pan-subunits peaks (Figure 3A and Supplemental Figure S2,



241 A and B). The target genes of the three ATPases, SYD, MINU2 and BRM, showed  
242 significant overlaps ( $n = 4,093$ ); however, they also exhibited specific binding sites,  
243 especially for MINU2 ( $n = 4,433$ ) (Figure 3B). Similar results were shown for the other  
244 complex-specific subunits, such as SWI3D for SAS, SWI3A for MAS and SWI3C for  
245 BAS (Supplemental Figure S2C). Hierarchical clustering performed on ChIP-seq read  
246 density over the merged set of peaks across all ChIPs identified distinct, complex-  
247 specific enrichment on chromatin (Figure 3C and Supplemental Figure S2D). Indeed,  
248 SAS and MAS complexes were accumulated near transcription start sites (TSSs)  
249 relative to BAS complexes, which were substantially more enriched over gene bodies  
250 (Figure 3, D-E and Supplemental Figure S2E). Consistently, SYD and MINU2 located  
251 more frequently over the promoters of the target genes in comparison to BRM, which  
252 showed a preference for binding over exons and introns (Figure 3, F and G). Similarly,  
253 when we examined the enrichment patterns of other complex-specific subunits, we  
254 found that they exhibited similar distributions with their corresponding ATPases. For  
255 instance, the BAS specific subunits SWI3C, BRIP1/2 and SWP73A, like BRM, showed  
256 more enrichment over gene bodies compared with SWI3D and SWI3A (Supplemental  
257 Figure S2, F and G). Surprisingly, when comparing the binding summit of SWI3C with  
258 that of BRM, we found that the SWI3C summit was obviously shifted towards the TSSs,  
259 reflecting the different occupancies between SWI3C and the BRM ATPase within the  
260 BAS sub-complexes (Supplemental Figure S2, H and I). In this regard, one possible  
261 explanation is that the BAS sub-complexes contain three BRDs (BRD1/2/13) in their  
262 core module that can recognize histone acetylation on chromatin and a BRM in their  
263 ATPase module that may bind acetylated histones and DNA through its C-terminal  
264 bromodomain and AT-hook domain, respectively (Zhao et al., 2018; Yu et al., 2021).  
265 Supporting this notion, we found that the width of BAS complexes peaks was  
266 significantly larger than that of SAS and MAS complexes (Figure 3, E and H).

267 Next, we want to assess whether the three sub-complexes could mutually regulate  
268 their binding positions on chromatin. To this end, we examined the genomic occupancy  
269 of the BAS complexes upon the loss of the SAS, and vice versa. We introduced the loss-  
270 of-function *syd-5* mutant into the *BRM-GFP* transgenic line (*pBRM:BRM-GFP brm-1*

271 *syd-5*) and loss-of-function *brm-1* mutant into the *SYD-N-GFP* transgenic line  
272 (*pSYD:SYD-N-GFP syd-5 brm-1*) and then performed ChIP-seq assays. We found that  
273 the SYD occupancy density was decreased upon BRM mutation at the genes that are  
274 co-targeted by BRM and SYD, but the average occupancy intensity of BRM was almost  
275 the same in the *syd-5* background compared with WT (Figure 3, I-K). However, in the  
276 absence of SYD, the BRM binding position appeared to have a significant shift (from  
277 gene body to TSS) at BRM-SYD co-target genes (Figure 3, I and K), implying that SAS  
278 sub-complexes enable BAS sub-complexes to bind to chromatin accurately.

279 Motif analyses revealed a significant central enrichment of the three sub-  
280 complexes over known transcription factor motifs, including NAC, bZIP, bHLH, BES1,  
281 BZR1, FAR1 and TCP. However, BRM preferentially localized to Trihelix and  
282 AP2EREBP and specifically localized to HSF, NLP and ABI3VP1 (Figure 3L). In  
283 addition, MINU2 specifically localized to C2C2COlike (Figure 3L). These results  
284 imply specialized roles for SAS, MAS and BAS complexes at the corresponding motifs.  
285 Furthermore, Gene Ontology (GO) enrichment analysis of the three ATPases and core  
286 subunits (SWI3D, SWI3A and SWI3C) showed enrichment of shoot system  
287 development, response to light stimulus, growth, and flower development  
288 (Supplemental Figure S2J and Supplemental Figure S3). Of note, MAS sub-complex  
289 core members MINU2 and SWI3A were particularly enriched in many biological  
290 pathways different from BAS and SAS sub-complex, such as embryo development,  
291 mRNA processing, chromatin organization and DNA methylation (Figure 3M,  
292 Supplemental Figure S2J and Supplemental Figure S3). When we further analyzed the  
293 enrichment signals of SAS, MAS, and BAS on the genes involved in DNA methylation  
294 regulation, we found that MINU2 and SWI3A, the MAS-specific subunits, were  
295 significantly enriched on these genes, while the SAS and BAS showed less or no  
296 enrichment (Supplemental Figure S4). Collectively, these data suggested a potential  
297 specific role for the MAS sub-complexes in the regulation of DNA methylation.

298 We previously showed that BAS complexes subunits BRM and BRD1/2/13  
299 preferentially occupied active histone modification markers (Zhao et al., 2018; Yu et  
300 al., 2021). In humans, all three BAF subcomplexes were localized to active enhancers

301 and promoters (H3K27ac and H3K4me1) (Michel et al., 2018). When we analyzed the  
302 enrichment signals of the active markers (H3K9ac, H3K27ac, H4K5ac, H4K8ac,  
303 H3K4me2, H3K4me3, and H3K36me3) and the repressive markers (H3K27me3) at the  
304 peaks that are occupied by SYD, MINU2 or BRM, we found that the MINU2 and BRM  
305 binding peaks enriched by the active histone marks but are depleted of the repressive  
306 one (Supplemental Figure S5A). In contrast, the peaks center of SYD lacked the active  
307 markers but showed the highest H3K27me3 enrichment signals among the three  
308 ATPases (Supplemental Figure S5A). Moreover, SYD peaks displayed a weak Pol II  
309 enrichment relative to MINU2 and BRM peaks (Supplemental Figure S5A). When we  
310 repeated this analysis using the sub-complexes co-binding peaks and their unique  
311 binding peaks, we observed that the active markers were significantly enriched on the  
312 co-binding peaks of SYD-MINU2-BRM, as well as on the MINU2 unique and BRM  
313 unique peaks, but were almost not enriched on the SYD unique peaks (Supplemental  
314 Figure S5B and C). However, there is a strong enrichment of H3K27me3 signals on the  
315 SYD unique peak. Moreover, the same results were obtained when we used the complex  
316 specific subunit peaks for the analysis (Supplemental Figure S6). Together, these  
317 results demonstrate plant SWI/SNF complex-specific chromatin localization and  
318 indicate a specialized enrichment of SAS over the repressive chromatin regions, which  
319 has not been observed in human SWI/SNF complexes.

320

### 321 **SWI3D subunit acts in the SAS complexes to regulate genome-wide gene** 322 **expression**

323 Our biochemical data above suggested that among the four SMARCC paralogs in plants,  
324 SWI3D is selectively incorporated into the SAS complexes but not the MAS and BAS  
325 complexes (Figure 1). To determine whether SWI3D is functionally relevant to the SAS  
326 complexes, we compared the morphological phenotypes between *syd-5* and *swi3d-1*  
327 loss-of-function mutants and observed that the two mutant seedlings showed  
328 extraordinarily identical phenotypes, including root length, leaf shape, and plant growth  
329 status (Figure 4, A and B) (Sarnowski et al., 2005; Shu et al., 2021). Moreover, we  
330 introduced the *swi3d-1* into the *syd-5* and found that the *swi3d-1 syd-5* double mutants

331 displayed the same phenotypes as *syd-5* and *swi3d-1* single mutants, showing that loss  
332 of SWI3D did not enhance the phenotypes of *syd-5* null mutant. Thus, SWI3D function  
333 selectively in the SAS complexes with SYD to regulate the plant development  
334 processes.

335 To corroborate these findings, we analyzed RNA-sequencing (RNA-seq) data  
336 comparing the transcriptome of *swi3d-1* mutants with that of *syd-5*, *brm-1*, and *minu1-2*  
337 *minu2-1* mutant seedlings. This global transcriptional profiling revealed similar  
338 effects on gene expression between *swi3d-1* and *syd-5* mutants, whereas loss of BRM  
339 or MINU1/2 (BAS- and MAS-ATPase, respectively) resulted in discordant  
340 transcriptional effects (Figure 4C). Indeed, approximately 80% of the 1,834 upregulated  
341 and 1,640 downregulated genes in *swi3d-1* (1,462 and 1,306, respectively) exhibited  
342 the same direction of mis-regulation in *syd-5* mutants (Figure 4, D and E). The  
343 transcriptome of *swi3d-1* was strongly positively correlated with that of mutants *syd-5*  
344 (correlation coefficient  $R^2 = 0.9291$ ) (Figure 4F). Furthermore, genes mis-regulated in  
345 *syd-5* or *swi3d-1* significantly overlapped with SYD target genes (Supplemental Figure  
346 S7). Moreover, the SYD target genes misregulated in *swi3d-1* showed a very high  
347 overlap with those misregulated in *syd-5* mutants (Figure 4G). GO term analysis  
348 showed that genes regulated by SYD and SWI3D are involved in regulating  
349 development of tissues and organs and responding to wounding and auxin (Figure 4, H  
350 and I). Together, these data demonstrate that SWI3D and SYD are in the same complex  
351 to regulate gene expression in *Arabidopsis*.

352

### 353 **SWI3D is required for the assembly and integrity of SAS sub-complexes**

354 In mammals, the assembly of the SWI/SNF complexes is initiated by the formation of  
355 a “core module” that is constituted by two SMARCC and one SMARCD subunits. This  
356 initial trimer then acts as a platform for docking of other subunits for assembly toward  
357 fully formed SWI/SNF complexes (Mashtalir et al., 2018). Because *Arabidopsis*  
358 SWI3D is a paralog of SMARCCs in mammals (Figure 2A), we thought to  
359 biochemically evaluate the effects of SWI3D loss on SAS protein complex assembly  
360 and integrity. To this end, we introduced the *SYD-GFP* transgene into the *swi3d-1*

361 mutant background and assessed the abundance and integrity of SAS complexes using  
362 immunoprecipitation. The loss of SWI3D did not significantly change the messenger  
363 RNA levels of *SYD-GFP* (Figure 5A) but resulted in substantially reduced protein  
364 abundance of SYD-GFP (Figure 5, B-D). Furthermore, immunoprecipitation of SYD-  
365 GFP followed by mass spectrometry analysis showed that loss of SWI3D resulted in  
366 significantly reduced peptides corresponding to SYD and near-complete degradation of  
367 SAS sub-complex components (Figure 5, E and F). Notably, the protein level of BRM,  
368 the BAS ATPase, showed no change in the *swi3d-1* background compared to WT  
369 (Supplemental Figure S8), confirming the specific downregulation of the SAS integrity  
370 by SWI3D mutation. Together, these data demonstrate a crucial role for the core module  
371 subunit SWI3D in the stabilization of the SAS sub-complexes and imply that SWI3D  
372 may be a part of the core module that is also necessary for the assembly of SWI/SNF  
373 complexes in *Arabidopsis*.

374 We next performed ChIP-seq assays comparing the genome-wide occupancy of  
375 SYD in WT with that in *swi3d-1* to assess the impact of SWI3D loss on the genome-  
376 wide targeting of the SAS complexes. In line with our biochemical findings, we  
377 observed substantial attenuation in SAS complex occupancy on the genome. The  
378 numbers of SYD-associated genomic sites and corresponding genes were extremely  
379 decreased in *swi3d-1* compared to WT (Figure 5G). Consistently, the occupancy of  
380 SYD on the target genes was nearly disrupted in *swi3d-1* (Figure 5, H and I).  
381 Furthermore, at more than 90% of SYD binding sites, we found a marked reduction in,  
382 or elimination of, SYD occupancy in the absence of SWI3D, while only 29 loci showed  
383 an increase (Figure 5J). Independent ChIP-qPCR confirmed the reduction of SYD  
384 occupancy at individual loci in *swi3d-1* (Figure 5, K and L). These data indicate that  
385 SWI3D loss disrupts SYD occupancy on chromatin and target gene expression.

386

### 387 **The SANT and SWIRM assoc\_1 domain of SWI3D are required for the stability** 388 **of SAS sub-complexes**

389 We next sought to identify specific regions on SWI3D that uniquely underlie its  
390 function in SAS complex stability maintenance. SWI3D contains five conserved

391 domains, including SWIRM, ZnF, SANT, RPT1 and SWIRM\_assoc\_1. We generated  
392 individual domain-truncated SWI3D fragments tagged by GFP and stably expressed  
393 them in the *swi3d-1* mutant background (Figure 6A). Deletion of the SWIRM, ZnF and  
394 PRT1 domains did not affect the ability of SWI3D to rescue the *swi3d-1* mutant  
395 phenotypes (Figure 6B), indicating that they are dispensable for SWI3D, at least under  
396 our growth conditions. In contrast, the deletion of SWIRM\_assoc\_1 caused a complete  
397 failure to restore the morphological defects of *swi3d-1*, while SWI3D truncation lacking  
398 the SANT domain only partially recovered the phenotypes (Figure 6B). These data  
399 highlight the importance of the SANT and SWIRM\_assoc\_1 domains of SWI3D in  
400 SAS complexes function.

401 To understand the role of SANT and SWIRM\_assoc\_1 in the SAS complexes, we  
402 examined the protein levels of the truncated SWI3Ds. We observed that the deletion of  
403 the SANT domain resulted in a reduction in the level of SWI3D protein, and the deletion  
404 of the SWIRM\_assoc\_1 domain led to a failure to accumulate SWI3D protein (Figure  
405 6C). Notably, the decrease in their protein contents was not caused by the reduction of  
406 their transcription levels (Supplemental Figure S9A). Interestingly, the SANT and  
407 SWIRM\_assoc\_1 domains are evolutionary conserved in different eukaryotes,  
408 suggesting that their role in modulating SWI3D protein abundance could possibly be a  
409 conserved function (Supplemental Figure S9B). To further elaborate on this, we  
410 performed yeast two-hybrid (Y2H) assays to test which domain(s) of SWI3D interacts  
411 with the SYD (Figure 6D). We found that only the SANT domain, but not the other  
412 domains, is required for interaction with SYD ATPase and serves as a SAS binding  
413 domain (Figure 6E). Together, these results demonstrate that the SWI3D SANT domain  
414 is a SAS-complex-binding domain that underlies the critical role of SWI3D in the  
415 assembly of the SAS complexes.

416

#### 417 **The SYD ATPase module is required for the stability of the core module of the SAS** 418 **sub-complex**

419 Our data so far showed that the core module subunit SWI3D of SAS complexes plays  
420 a vital role in regulating the integrity of the complex. In mammals, recent studies

421 indicated that loss of ATPases results in a specific disruption of the ATPase module but  
422 has no effect on the assembly of the core module (Mashtalir et al., 2018; Pan et al.,  
423 2019). However, our above data showed that in Arabidopsis, disruption of SWI3D-SYD  
424 interaction by deleting the SWI3D SANT domain leads to a decrease in SWI3D protein  
425 abundance. We therefore speculated that, in contrast to their human paralogs, ATPase  
426 subunits in plants might be required to stabilize the core module.

427 To test this possibility, we introduced the loss-of-function *syd-5* mutant into the  
428 *SWI3D-GFP* transgenic line. Surprisingly, we found that the SWI3D-GFP protein levels  
429 were dramatically decreased in the absence of the SYD ATPase (Figure 7A); however,  
430 the expression level of *SWI3D-GFP* mRNA did not change significantly (Figure 7B).  
431 Furthermore, we conducted IP-MS experiments and found that in *syd-5* mutants, both  
432 the core module subunits (such as SWP73B and LFR) and the ATPase module subunits  
433 (such as ARP4/7 and BCL7A/B) were not co-immunoprecipitated (Figure 7C). These  
434 results indicate that the ATPase in SAS sub-complexes play an essential role in the  
435 stability of the core module. To test whether the requirement of ATPase for the stability  
436 of the complex is not restricted to SAS complexes but a widespread phenomenon for  
437 plant SWI/SNF complexes, we examined the consequences of BRM loss on the stability  
438 of SWI3C core module subunit in BAS complexes. We introduced the loss-of-function  
439 *brm-1* mutant into the *SWI3C-GFP* transgenic line and performed IP-MS assays. Upon  
440 the loss of BRM, SWI3C barely immunoprecipitated ATPase module subunits ARP4/7  
441 and BCL7A/B and less effectively immunoprecipitated the core subunit BRIP1/2,  
442 BRD1/13 and SWP73B (Supplemental Figure S10). Together, these data demonstrate  
443 that the ATPase module enables the full assembly of the core module of Arabidopsis  
444 SWI/SNF complexes, a plant-specific feature distinct from animal SWI/SNFs.

445 Finally, we tested the genomic binding of SWI3D in the *syd-5* mutants. ChIP-seq  
446 results showed that compared with the enrichment signals of SWI3D in the wild-type  
447 background, the number and the signal intensity of SWI3D binding peaks in the genome  
448 decreased sharply in *syd-5* (Figure 7, D-G). Independent ChIP-qPCR confirmed the  
449 reduction of SWI3D occupancy at individual loci in *syd-5* mutant (Figure 7, H and I).  
450 However, a subset of genomic sites was still occupied by SWI3D in the absence of SYD

451 ATPase (Figure 7D, E). Interestingly, we found that the SYD-independent SWI3D  
452 binding sites were more accessible than the SYD-dependent SWI3D binding sites  
453 (Supplemental Figure S11), possibly underscoring the different dependencies on the  
454 SYD ATPase in SAS genomic targeting.

455

## 456 **Discussion**

457 In this study, we demonstrate that Arabidopsis has three distinct SWI/SNF sub-  
458 complexes (SAS, MAS, and BAS), each containing complex-specific subunits that  
459 probably define their identity (Figures 1 and 2). We also comprehensively compared  
460 the chromatin binding profiles for the three sub-complexes relative to defined  
461 chromatin features (Figure 3). The SAS, MAS, and BAS sub-complexes showed  
462 differential occupancy patterns on target genes, associated unique cis-motifs, and  
463 localized to chromatin with different histone modifications, possibly underlying  
464 complex-specific functions. Moreover, the loss of SAS complexes results in a  
465 unexcepted shift of the BAS occupancy from gene body to TSSs, providing new  
466 insights into our understanding of how the genomic targeting of different SWI/SNF  
467 sub-complexes is coordinated for chromatin structure regulation. Finally, our work  
468 found a mutual dependency of the core module and the ATPase module of SAS in their  
469 assembly for maintaining the integrity of the complex in plants.

470 In the past two decades, numerous investigations on plant SWI/SNF complexes  
471 subunits have revealed various phenotypes caused by the perturbation of the subunits.  
472 However, due to the lack of information regarding to the subunit composition of plant  
473 SWI/SNF complexes, our understanding to the mechanisms by which these subunits  
474 regulate plant development and responses to environment stimulus has been severely  
475 affected. Moreover, in vitro protein-protein interaction assays may not identify  
476 endogenous, physiologically relevant complex-specific subunits. For example,  
477 previous yeast-two-hybrid assays showed the interaction between SWI3D and BRM  
478 (Bezhani et al., 2007). Here, our biochemical data demonstrated that SWI3C, but not  
479 SWI3D, is a BAS-specific subunit (Figure 1), which elaborates the similar phenotypes  
480 between *swi3c* and *brm* mutants, rather than between *swi3c* and *syd* or *minu* mutants



481 (Wagner D, 2002; Archacki et al., 2009; Sang et al., 2012). Consistently, we found that  
482 the phenotype and transcriptome of *swi3d-1* are reminiscent of *syd-5*, in support of the  
483 notion that SWI3D and SYD are in the SAS complexes. Moreover, the *swp73a* single  
484 mutant showed no phenotypes compared with the wild-type, but the *swp73b* single  
485 mutation caused severe alterations in the development of vegetative and reproductive  
486 organs (Sacharowski et al., 2015; Huang et al., 2021). Our data showed that SWP73B  
487 exists in all three SWI/SNF sub-complex, but SWP73A only belongs to the BAS sub-  
488 complexes. Thus, in the *swp73a* mutant, SWP73B could act in the three sub-complexes  
489 to maintain plant growth and development. However, in the absence of SWP73B, both  
490 SAS and MAS sub-complexes were disintegrated, explaining the strong developmental  
491 disorders. Overall, our data underscore the importance of comprehensively defining the  
492 subunits composition of the complexes to illustrate subunit functions within the context  
493 of sub-complexes.

494 One particularly unexpected result is that the ATPase module (SYD or BRM) is  
495 required for global complex stability and the interaction of core module subunits in  
496 SAS and BAS complexes in Arabidopsis. Previous biochemical and structural studies  
497 in humans showed that the mammalian ATPase module is the last to be incorporated  
498 into SWI/SNF complexes and therefore not required for the core module assembly  
499 (Mashtalir et al., 2018; Michel et al., 2018; Pan et al., 2019). Thus, our studies suggest  
500 an alternative, plant-specific assembly pathway in SWI/SNF complexes, further  
501 suggesting the separation and divergence of SWI/SNF complexes in eukaryotes.

502 Intriguingly, PAS1, PAS2, SHH2 and SSIP1/2/3 exist as conserved, plant-specific  
503 SWI/SNF subunits, suggesting an evolutionarily conserved function for those subunits  
504 that could not be appreciated by conventional sequence conservation analyses. Future  
505 functional and mechanistic characterization of those subunits would provide novel  
506 insight into the roles of plant SWI/SNF complexes in chromatin regulation.  
507 Furthermore, compared to SAS and BAS, the MAS sub-complexes showed a  
508 preferential occupancy at genes involved in the regulation of DNA methylation (Figure  
509 3M, Supplemental Figure 3 and 4). Previous studies have indicated that SWI3B, which  
510 we found to be a MAS-specific subunit, acts to promote DNA methylation at a subset

511 of genomic regions (Yang et al., 2020). Moreover, the MAS complexes contain an  
512 SHH2 subunit, whose paralog, SHH1, functions as a core component of RNA-directed  
513 DNA methylation by assisting in the recruitment of Pol IV (Law et al., 2013; Zhang et  
514 al., 2013). Together, these observations imply that the MAS sub-complexes may play a  
515 specialized role in regulating DNA methylation, which warrants future investigation.

516 A recent study demonstrated that the abundance of SWI/SNF complexes in human  
517 cells is not static but can be dynamically altered as a response to environmental changes  
518 (Tran et al., 2022). For example, the protein levels of PBAF-specific subunits ARID2  
519 and PBRM1, and of ncBAF-specific subunit BRD9 are downregulated in response to  
520 hypoxic stresses, while all cBAF-specific members are retained. Here, our GO analysis  
521 of the three plant SWI/SNF sub-complexes revealed varying degrees of enrichments in  
522 defense response to bacterium, response to salt stress, immune system process, response  
523 to light stimulus and cellular response to phosphate starvation and so on. Thus, we  
524 speculate that the abundances of the three plant SWI/SNF sub-complexes may be  
525 dynamic rather than static in response to multifarious environmental signals for timely  
526 and precisely regulation of gene expression.

527 Finally, our proteomic analysis showed that some homologous subunits in SAS,  
528 MAS, or BAS are mutually exclusive in the complexes. For example, for SAS  
529 complexes, the three SSIPs (SSIP1, SSIP2, SSIP3) are separately incorporated into the  
530 SAS complexes (Figure 1B). Similarly, OPF1, the MAS-specific subunit, did not exist  
531 in the OPF2-containing MAS complexes (Diego-Martin et al., 2022). Finally, BAS-  
532 specific subunit BRIP1 cannot co-immunoprecipitated with BRIP2, and BRD1 cannot  
533 co-immunoprecipitated with BRD2 and BRD13 (Figure 1B). These observations  
534 suggest that the existence of multiple subunit paralogs across these three distinct SWI/  
535 SNF sub-complexes may result in further diversification. Based on the multiple subunit  
536 paralogs across the three SWI/SNF sub-complexes, we calculated the full set of possible  
537 combinations (Supplemental Figure S12), in which there are at least 36 possible  
538 combinations of SAS sub-complexes, 288 possible combinations of MAS sub-  
539 complexes, and 144 possible combinations of BAS sub-complexes.

540 In summary, the illustration of three plant SWI/SNF complexes by our work

541 provides a critical foundation for further structural and functional characterization of  
542 this family of plant chromatin remodeling complexes that play crucial roles in  
543 regulating plant development and signaling responses through chromatin modulation.  
544 Our results highlight and reinforce the power of examining the organization, assembly  
545 and genomic targeting to advance our mechanistic understanding of SWI/SNF-  
546 mediated chromatin remodeling in plants.

547

## 548 **MATERIALS AND METHODS**

### 549 **Plant materials and growth conditions**

550 Transfer DNA insertion lines, *minu2-1* (SALK\_057856), *swi3a-3* (SALK\_068234), *bsh*  
551 (SALK\_058513), *syd-5* (SALK\_023209), *swi3d-1* (SALK\_100310), *swp73a-2*  
552 (SALK\_083920), *swp73b-1* (SALK\_113834), *ssip2-1* (SALK\_109947), *ssip3-1*  
553 (SALK\_010574), *bcl7a-1* (SALK\_027934) and *bcl7b-1* (SALK\_029285) were  
554 obtained from the Arabidopsis Biological Resource Center (ABRC). Mutants *brm-1*  
555 (SALK\_030046), *pBRM:BRM-GFP brm-1* and *pSYD:SYD-N-GFP syd-5* transgenic  
556 plants were previously described (Li et al., 2016; Shu et al., 2021). Primers used for  
557 genotyping are listed in Supplementary Table 1.

558 For RT-qPCR/RNA-seq, ChIP-qPCR/ChIP-seq and IP-MS assays, *Arabidopsis*  
559 seeds were sterilized with 20% sodium hypochlorite solution for 15 mins, washed with  
560 sterile water five times, and then stratified at 4 °C in darkness for three days. Seeds  
561 were then sown on ½ Murashige and Skoog (MS) medium containing 1% sucrose and  
562 0.6% agar. For phenotypic analysis, seeds were sown on a mixture of soil and  
563 vermiculite (1:1). Seedlings were grown under long-day conditions (16 h light/8 h dark)  
564 at 22 °C.

565

### 566 **Generation of transgenic plants**

567 Full-length genomic regions of *SWI3A*, *SWI3B*, *SWI3C*, *SWI3D*, *SWP73A*, *BSH*,  
568 *MINU2*, *SSIP1*, *SSIP2*, *SSIP3*, *SWI3DΔSWIRM*, *SWI3DΔZnF*, *SWI3DΔSANT*,  
569 *SWI3DΔRPT1* and *SWI3DΔSWIRM\_assoc\_1*, driven by their native promoters were  
570 cloned into *pCAMBIA1302* vector by using ClonExpress Ultra One Step Cloning Kit

571 (Vazyme, Cat. No. C115-01) and ClonExpress MultiS One Step Cloning Kit (Vazyme,  
572 Cat. No. C113-01). Full-length genomic regions of *BCL7A*, *BCL7B* and *SWP73B*,  
573 driven by their native promoters were amplified from genomic DNA by PCR, then  
574 cloned into the *pDONR221* vector by BP reaction (Invitrogen), and further subcloned  
575 into the destination plasmid *pMDC107* (Curtis and Grossniklaus, 2003) by LR reaction  
576 (Invitrogen). The constructs were introduced into *Agrobacterium tumefaciens* strain  
577 *GV3101* and were then used to transform corresponding single mutant or WT (e.g.,  
578 *SWI3B*, *SWI3C* and *SSIP1*) plants using the floral dip method (Clough and Bent, 1998).  
579 To obtain *BRM-GFP brm-1 syd-5* and *BRM-GFP brm-1 swi3d-1* transgenic plant, the  
580 *BRM-GFP brm-1* transgenic plant was crossed with *syd-5* and *swi3d-1* single mutant.  
581 Similar like this, the *SYD-N-GFP syd-5* transgenic plant was crossed with *brm-1* single  
582 mutant to obtain *SYD-N-GFP syd-5 brm-1* transgenic plant, the *SYD-N-GFP syd-5*  
583 transgenic plant was crossed with *swi3d-1* single mutant to obtain *SYD-N-GFP syd-5*  
584 *swi3d-1* transgenic plant, the *SWI3C-GFP* transgenic plant was crossed with *brm-1*  
585 single mutant to obtain *SWI3C-GFP brm-1* transgenic plant and the *SWI3D-GFP*  
586 *swi3d-1* transgenic plant was crossed with *syd-5* single mutant to obtain *SWI3D-GFP*  
587 *swi3d-1 syd-5* transgenic plant. Primers used for constructing are listed in  
588 Supplementary Table 1.

589

### 590 **Y2H assay**

591 The full-length or truncated coding regions of SYD or SWI3D were cloned into  
592 *pGADT7* (AD) or *pGBKT7* (BD). Then the AD and BD plasmids were co-transformed  
593 into the yeast strain *AHI09* and spread on the medium that lacking leucine (Leu) and  
594 tryptophan (Trp) (SD-Leu/-Trp). Positive colonies on SD-Leu/-Trp medium were  
595 further picked up and dropped on the selection medium lacking adenine (Ade), histidine  
596 (His), Leu and Trp (SD-Leu/-Trp/Ade/His). Primers used for constructing are listed in  
597 Supplementary Table 1.

598

### 599 **Confocal microscopy**

600 The GFP signals from the root tips of transgenic plants were observed using the  
601 LSM880 microscope. The average fluorescence intensity of the GFP signals were  
602 calculated by the Histo function of the LSM880 microscope.

603

#### 604 **Co-immunoprecipitation and mass spectrometry (IP-MS)**

605 For IP-MS, about 5 g of 14-day-old seedlings under long-day conditions were harvested  
606 and ground to a fine powder in liquid nitrogen. Then, the powers were collected and  
607 homogenized in 10 ml of lysis buffer (50 mM HEPES [pH 7.5], 300 mM NaCl, 10 mM  
608 EDTA, 1% Triton X-100, 0.2% NP-40, 10% glycerol, 2 mM DTT, 1× Complete  
609 Protease Inhibitor Cocktail (Roche)) at 4°C for 30 min. After centrifugation at 11,000  
610 rpm and 4 °C for 15 min (twice), the supernatant was diluted by equal volume dilution  
611 buffer (50 mM HEPES [pH 7.5], 10 mM EDTA, 10% glycerol, 2 mM DTT, 1×  
612 Complete Protease Inhibitor Cocktail (Roche)) and then incubated with GFP\_trap beads  
613 (Cat. No. KTSM1301) at 4 °C for 3 h with gently rotation. Beads were then washed  
614 three times with washing buffer (50 mM HEPES [pH 7.5], 150 mM NaCl, 10 mM  
615 EDTA, 0.2% Triton X-100, 0.1% NP-40, 10% glycerol). Proteins were eluted in SDS  
616 loading buffer and incubated at 55°C for 10 min, followed by immunoblotting or silver  
617 staining.

618 For mass spectrometry, the immunoprecipitated proteins were eluted using 0.2 M  
619 glycine solution (pH 2.5), and then subjected to reduction with dithiothreitol, alkylation  
620 with iodoacetamide and digested with trypsin (Thermo Fisher, Cat. No. 90057, MS  
621 grade). The samples were analyzed on a Thermo Scientific Q Exactive HF mass  
622 spectrometer. Spectral data were searched against the TAIR10 database using Protein  
623 Prospector 4.0. Two or three biological replicates were included in the IP-MS analysis.  
624 Raw data were searched against the TAIR10. Default settings for Label-free  
625 quantitation (LFQ) analysis using MaxQuant (Tyanova et al., 2016a) and Perseus  
626 (Tyanova et al., 2016b) software were applied to calculate the LFQ intensities with  
627 default settings.

628

#### 629 **Nuclear protein extraction**

630 For nuclear protein extraction, 0.2 g of 14-day-old seedlings grown on 1/2 MS medium  
631 was ground to fine powder in liquid nitrogen to extract the nucleoproteins. Nuclei were  
632 isolated following the CHIP protocol (Li et al., 2016) without tissue fixation. Briefly,  
633 nuclear proteins were released by incubating the nuclei preparation in 200 ml of lysis  
634 buffer (50 mM Tris-HCl, 10 mM EDTA, 1% SDS, and 1× protease inhibitors) for 3h  
635 at 4°C. Then, the extract was diluted with equal volume of CHIP dilution buffer (16.7  
636 mM Tris-HCl [pH 8.0], 167 mM NaCl, and 1.1% Triton X-100) and centrifuged at  
637 15,000 g for 10 min at 4°C to remove debris, followed by immunoblotting.

638

### 639 **Immunoblotting**

640 Proteins were loaded onto 4%-20% gradient protein gels (GenScript, SurePAGE, Cat.  
641 No. M00655) and 4%-20% Precast Protein Plus Gel (Yeasen, Cat. No. 36256ES10) at  
642 120 V for 2 h. A wet transformation was performed at 90 V for 90 min in ice-cold  
643 transfer buffer. After that, the membranes were blocked in 5% non-fat milk at room  
644 temperature for 1 h on a shaking table (60 rpm). Finally, the blocked membranes were  
645 incubated in the corresponding antibodies solutions at room temperature for another 3  
646 h. The following antibodies were used: anti-GFP (Abcam, Cat. No. ab290, 1:10,000  
647 dilution), anti-H3 (Proteintech, Cat. No. 17168-1-AP, 1:10,000 dilution). The  
648 intensities of blotting signals were quantified using ImageJ software (v.1.50i).  
649 Uncropped scans of immunoblotting results are shown in Supplementary Figure 13.

650

### 651 **Silver staining**

652 For silver staining, samples were run on a 4%-20% gradient protein gels (GenScript,  
653 SurePAGE, Cat. No. M00655) and stained with Fast Silver Stain Kit (Beyotime, Cat.  
654 No. P0017S) according to the manufacturer's instructions.

655

### 656 **RNA isolation, RT-qPCR and RNA-seq analyses**

657 Total RNA was extracted from 14-day-old Arabidopsis seedlings grown under long-  
658 day conditions using the HiPure Universal RNA Mini Kit (MAGEN, Cat. No. R4130)  
659 according to the manufacturer's instructions. FOR RT-qPCR, 1 µg RNA was used for

660 DNase digestion and reverse transcription using HiScript III 1st Strand cDNA  
661 Synthesis Kit (+gDNA wiper) (Vazyme, Cat. No. R312-01). The transcribed cDNA  
662 underwent qPCR assays were performed using ChamQ Universal SYBR qPCR Master  
663 Mix (Vazyme, Cat. No. Q711-02) in the StepOne Plus (Applied Biosystems). Results  
664 were repeated with three biological replicates. Quantification was analyzed with the  
665 relative  $-\Delta\Delta C_t$  method (Livak and Schmittgen, 2001). *ACTIN2* were served as the  
666 control for mRNA analyses. The sequences of primers used are listed in Supplementary  
667 Table 1.

668 For RNA-seq analyses, RNA from three biological replicates were sequenced  
669 separately at Novogene (sequencing method: nova-seq PE150). After removal of  
670 adapters and low-quality reads, the clean reads were mapped to the TAIR10  
671 Arabidopsis genome using TopHat (v2.1.1) with default settings (Kim et al., 2013),  
672 except that a minimum intron length of 20 base pairs (Snelders et al.) and a maximum  
673 intron length of 4,000 bp were required. Mapped reads were then assembled according  
674 to the TAIR10 version of genome annotation using Cufflinks (v.2.1.1) with default  
675 settings (Trapnell et al., 2012). For analysis of differential expression, the assembled  
676 transcripts from three independent biological replicates in WT and other mutants (*syd-*  
677 *5* and *swi3d-1*) were included and compared using Cuffdiff (v.2.1.1) with default  
678 settings (Trapnell et al., 2012). Finally, genes with at least 1.5-fold change in expression  
679 ( $P < 0.05$ ) were considered differentially expressed (see Supplementary Table 2 for  
680 details). To calculate the significance of the overlap of two groups of genes drawn from  
681 the set of genes, the total number of genes in the Arabidopsis genome used was 34,218  
682 (27,655 coding and 6,563 non-coding genes) according to EnsemblPlants  
683 (<http://plants.ensembl.org/index.html>).

684

### 685 **ChIP and ChIP-seq analysis**

686 ChIP experiments were performed as previously described (Gendrel et al., 2005; Li et  
687 al., 2016; Yu et al., 2021) with minor changes. In brief, 14-day-old seedlings (0.5 g for  
688 each biological replicate) grown on ½-strength MS medium under long-day conditions  
689 were fixed using 1% formaldehyde under a vacuum for 15 min and then ground into a

690 fine powder in liquid nitrogen. The chromatin was sonicated into 300-500 bp fragments  
691 using a Bioruptor sonicator with a 30/45-s on/off cycle (27 total on cycles).  
692 Immunoprecipitation was performed using 1 µl of anti-GFP (Abcam, Cat. No. ab290)  
693 plus 40 µl Agarose beads (Abcam, Cat. No. 16-157) at 4 °C overnight. Next day, the  
694 beads were washed subsequently with low-salt buffer, high-salt buffer, ChIP wash  
695 buffer and TE buffer, and then the immunoprecipitated chromatin were eluted with  
696 Elution buffer. Finally, after the eluate subsequently subjected to reverse crosslinks,  
697 RNase digestion and Proteinase K digestion, the DNA was purified by  
698 phenol/chloroform/isoamyl. ChIP-qPCR was performed with three biological  
699 replicates, and the results were calculated as a percentage of input DNA according to  
700 the Champion ChIP-qPCR user manual (SABioscience). The primers used for ChIP-  
701 qPCR are listed in Supplementary Table 1.

702 For ChIP-seq, 1 g of seedlings was used, and the ChIPed DNA was purified using  
703 the MinElute PCR purification kit (Qiagen, Cat. No. 28004). Libraries were constructed  
704 with 2ng of ChIPed DNA using the VAHTS Universal DNA Library Prep Kit for  
705 Illumina V3 (Vazyme Biotech, Cat. No. ND607), VAHTSTM DNA Adapters set3-set6  
706 for Illumina (Vazyme Biotech, Cat. No. N805) and VAHTS DNA Clean Beads  
707 (Vazyme Biotech, Cat. No. N411-02) according to the manufacturer's protocol. High-  
708 throughput sequencing was performed at Novogene (sequencing method: NovaSeq-  
709 PE150).

710 ChIP-seq data analysis was performed as previously described (Yu et al., 2020; Yu  
711 et al., 2021). In brief, raw data was trimmed by fastp with following parameters: “-g -q  
712 5 -u 50 -n 15 -l 150”. The clean data was mapped to the *Arabidopsis thaliana* reference  
713 genome (TAIR10) using Bowtie2 with the default settings (Langmead and Salzberg,  
714 2012). Only perfectly and uniquely mapped reads were used for further analysis. A  
715 summary of the number of reads for each sample is given in Supplementary Tables 3  
716 and 4. MACS 2.0 (Feng et al., 2012) was used for peak calling with the following  
717 parameters: “gsize = 119,667,750, bw = 300, q = 0.05, nomodel, extsize = 200.” The  
718 aligned reads were converted to wiggle (wig) formats, and bigwig files were generated  
719 by bamCoverage with “-bs 10” and “-normalize using RPKM (reads per kilobase per



720 million)” in deepTools (Ramirez et al., 2016). The data were imported into the  
721 Integrative Genomics Viewer (IGV) (Robinson et al., 2011) or Integrated Genome  
722 Browser (IGB) (Freese et al., 2016) for visualization. Only peaks that were present in  
723 both biological replicates (irreproducible discovery rate  $\geq 0.05$ ) were considered for  
724 further analysis. To annotate peaks to genes, ChIPseeker was used with default settings  
725 (Yu et al., 2015). Differential occupancy was determined using DiffBind with default  
726 settings (Ross-Innes et al., 2012). Venn diagrams were created using Venny (v.2.1)  
727 (<https://bioinfogp.cnb.csic.es/tools/venny/index.html>) to compare overlaps between  
728 different groups of genes. ComputeMatrix and plotProfile (Ramírez et al., 2016) were  
729 used to compare the mean occupancy density (details are shown in each corresponding  
730 figure legends).

731 To analyze read density and correlation between different ChIP-seq samples, we  
732 performed spearman correlation analysis. Reads density was analyzed over the merged  
733 set of binding sites across all ChIPs using multiBigwig-Summary function from  
734 deepTools. The heatmap of spearman correlation was generated by PlotCorrelation  
735 function in deepTools (Ramírez et al., 2016). Peak overlaps were analyzed by Bedtools  
736 intersect function.

737

### 738 **Gene ontology analysis**

739 Gene Ontology (GO) enrichment analysis was performed using the DAVID  
740 Bioinformatics Resources (<https://david.ncifcrf.gov/>) and plotted at HILOT ([hiplot-](http://hiplot-academic.com)  
741 [academic.com](http://hiplot-academic.com)).

742

### 743 **Phylogenetic analysis**

744 The amino acid sequences of orthologs proteins of SWI3D in different species were  
745 downloaded from UniProt database and used for phylogenetic analysis. The  
746 phylogenetic tree was constructed with MEGA11 (Tamura et al., 2021) using the  
747 neighbor-joining method with 1000 bootstrap replicates and the Poisson model.

748

### 749 **Data availability**

750 The ChIP-seq and RNA-seq datasets have been deposited in the Gene Expression  
751 Omnibus under accession no. GSE218841 and GSE218842, respectively. The mass  
752 spectrometry proteomics data have been deposited in the Integrated Proteome  
753 Resources under the dataset identifier IPX0005495000. The BRD1, BRD2, and BRD13  
754 ChIP-seq data and *brm-1* RNA-seq data were downloaded from GEO under accession  
755 no. GSE161595. BRIP1 and BRIP2 ChIP-seq data were downloaded from GEO under  
756 accession no. GSE142369. The H3K27me3 ChIP-seq data were downloaded from GEO  
757 under accession no. GSE145387. The H3K4me3 ChIP-seq data were downloaded from  
758 GEO under accession no. GSE183987. The H3K4me1 and H3K4me2 ChIP-seq data  
759 were downloaded from DDBJ databases under the accession number DRA010413. The  
760 H3K36me3 ChIP-seq data and *minu1-2 minu2-1* RNAseq data were downloaded from  
761 GEO under accession no. GSE205112. The H3K9me1 ChIP-seq data were downloaded  
762 from GEO under accession no. GSE146948. The H3K9ac, H3K27ac, H4K5ac and  
763 H4K8ac ChIP-seq data were downloaded from GEO under accession no. GSE183987.  
764

#### 765 **ACCESSION NUMBERS**

766 Accession numbers of genes reported in this study include: AT2G46020 (*BRM*),  
767 AT1G21700 (*SWI3C*), AT3G01890 (*SWP73A*), AT3G03460 (*BRIP1*), AT5G17510  
768 (*BRIP2*), AT1G20670 (*BRD1*), AT1G76380 (*BRD2*), AT5G55040 (*BRD13*),  
769 AT2G28290 (*SYD*), AT4G34430 (*SWI3D*), AT5G07940 (*SSIP1*), AT5G07970 (*SSIP2*),  
770 AT5G07980 (*SSIP3*), AT3G06010 (*MINU1*), AT5G19310 (*MINU2*), AT2G47620  
771 (*SWI3A*), AT2G33610 (*SWI3B*), AT3G17590 (*BSH*), AT3G18380 (*SHH2*), AT1G58025  
772 (*BRD5*), AT3G52100 (*TPF1*), AT3G08020 (*TPF2*), AT1G50620 (*OPF1*), AT3G20280  
773 (*OPF2*), AT1G32730 (*PSA1*), AT1G06500 (*PSA2*), AT5G14170 (*SWP73B*),  
774 AT3G22990 (*LFR*), AT1G01160 (*GIF2*), AT1G18450 (*ARP4*), AT3G60830 (*ARP7*),  
775 AT4G22320 (*BCL7A*), AT5G55210 (*BCL7B*), AT3G18780 (*ACTIN2*) and AT5G09810  
776 (*ACTIN7*).

777

#### 778 **COMPETING FINANCIAL INTERESTS**

779 The authors declare no competing financial interests.

780

## 781 **AUTHOR CONTRIBUTIONS**

782 C.L. conceived the project. W.F. and Y.Y. performed most of the experiments. J.S.  
783 generated *SYD-GFP* transgenic lines. W.F., Y.Y., Y.Z., and Z.Y. conducted  
784 bioinformatics analysis. W.F., Y.Y., J.S., Z.Y., T.Z., Y.Z., Z.Z., Z.L., Y.C., C.C. and  
785 C.L. analyzed data. C.L. wrote the manuscript.

786

## 787 **ACKNOWLEDGEMENTS**

788 We thank the Arabidopsis Biological Resource Center (ABRC) for seeds of T-DNA  
789 insertion lines. This work was supported by the National Natural Science Foundation  
790 of China to C.L. (32270322, 32070212, and 31870289) and to Y.Y. (32200279), the  
791 Guangdong Basic and Applied Basic Research Foundation to C.L. (2021A1515011286)  
792 and to Y.Y. (2021A1515110386), Postdoctoral Innovation Talents Support Program to  
793 Y.Y. (BX2021396), and the Fundamental Research Funds for the Central Universities  
794 to C.L. (18lgzd12).

795

## 796 **Figure legends**

797 **Figure 1 Three distinct SWI/SNF sub-complexes in *Arabidopsis*.** **A**, Volcano plots  
798 displaying SWI/SNF subunits that are enriched in GFP immunoprecipitations from  
799 BRM-GFP, SYD-GFP, MINU2-GFP relative to GFP from two independent  
800 experiments. *P* values were calculated by two-tailed Student's *t*-test. Subunits of the  
801 *Arabidopsis* SWI/SNF complexes are highlighted using green dots (BRM unique  
802 subunits), blue dots (SYD unique subunits), magenta dots (MINU unique subunits) and  
803 black dots (BRM, SYD and MINU2 shared subunits). **B**, Heatmap showing the mean  
804  $\log_2(\text{PSM}+1)$  values (from two biological replications) of SWI/SNF complex subunits  
805 identified by IP-MS in BRM, SWI3C, BRIP2, BRD1, SWP73A, SYD-N, SWI3D,  
806 SSI1/2/3, MINU2, SWI3A, SWI3B, BSH, SWP73B and BCL7B. **C**, Diagrams  
807 showing the organization of BAS, SAS and MAS complexes, respectively. Silver-  
808 stained gels of GFP immunoprecipitations from SWI3C-GFP, SWI3D-GFP and  
809 SWI3A-GFP were shown. The specific subunits of each sub-complex were marked with

810 different colors, and the common subunits of different sub-complexes were marked  
811 with gray.

812

813 **Figure 2 Comparison of subunit composition of SWI/SNF complexes in**  
814 ***Saccharomyces cerevisiae*, *Homo sapiens* and *Arabidopsis thaliana*.** **A**, SWI/SNF  
815 sub-complex components in the three species. The *SMARC* names correspond to  
816 lineage-specific subunits previously identified (Hernández-García et al., 2022) and the  
817 characters in brackets represent different protein modules. **B**, Diagrams displaying the  
818 subunits composition of different SWI/SNF sub-complexes in eukaryotes. The specific  
819 subunits of each complex were highlighted by different colors, and the common  
820 subunits of different sub-complexes of the same species were marked with gray.

821

822 **Figure 3 SAS, MAS and BAS sub-complexes show differential binding patterns in**  
823 **genome-wide.** **A**, Venn diagrams displaying statistically significant overlaps among  
824 genes occupied by SYD, MINU2 or BRM with those by SWP73B. *P* values were  
825 calculated by the hypergeometric test. **B**, Venn diagram displaying statistically  
826 significant overlaps among genes occupied by SYD, MINU2 and BRM. *P* values were  
827 calculated by the hypergeometric test. **C**, Heatmap representing correlations between  
828 normalized ChIP-seq reads over a merged set of all SWI/SNF subunit peaks. **D**, SYD,  
829 MINU2, and BRM complex ChIP-seq read density distribution over the TSS and 2.5  
830 kb into the gene body at their target genes. **E**, IGV views of ChIP-seq signals of SYD,  
831 MINU2 and BRM at representative genes. The dash lines indicated the peak summits. **F**,  
832 Pie charts showing the distribution of SYD, MINU2 and BRM peaks at genic and  
833 intergenic regions in the genome. **G**, Metagene plot and heatmap display the  
834 distribution of SYD, MINU2 and BRM peaks at genic and intergenic regions in the  
835 genome. Green arrows and dashed boxes indicate the gene body. **H**, Violin plots  
836 depicting the  $\log_{10}$ (peak length) of SYD, MINU2 or BRM at their corresponding peaks.  
837 *P* values are from two-tailed Mann-Whitney *U* test. **I**, Metagene plot showing the mean  
838 occupancy of SYD or BRM at their co-target genes. **J**, Violin plots depicting the  $\log_2$   
839 (no. of reads within  $\pm 0.5$  kb of TSS of BRM-GFP and SYD-GFP at their co-target

840 genes,  $P$  values were determined by the two-tailed Mann-Whitney  $U$  test. **K**, IGV views  
841 of ChIP-seq signals of BRM and SYD at representative genes. The diagrams underneath  
842 indicate gene structure. The y-axis scales represent shifted merged MACS2 tag counts  
843 for every 10-bp window. **L**, Heatmap of CentriMo log adjusted p-values for top motifs  
844 returned by MEME-ChIP analysis for each ChIP-seq experiment. P-values were  
845 calculated using binomial test. The sequence covering 250 bp (SYD and MINU2) or  
846 400 bp (BRM) on either side of each peak summit were used. **M**, Gene ontology  
847 analysis of MINU2 specific targets genes.

848

849 **Figure 4 SWI3D and SYD co-regulate gene expression.** **A**, root length of 7-day-old  
850 seedlings. Scale bars, 1 cm. Lowercase letters indicate significant differences between  
851 genetic backgrounds, as determined by the post hoc Tukey's HSD test. The number of  
852 "n = " indicates the number of plants that were used. Data are presented as mean  $\pm$   
853 s.d.. **B**, Left, leaf phenotype of 21-day-old seedlings. Scale bars, 1 cm. Right, seedlings  
854 phenotype of 40-day-old seedlings. Scale bars, 10 cm. **C**, Heatmap showing  
855 hierarchical clustering of differentially expressed genes in different mutants (total mis-  
856 regulated genes, 7,216). **D-E**, Venn diagrams showing statistically significant overlaps  
857 between genes up- or downregulated in *syd-5* and those in *swi3d-1*.  $P = 0$ ,  
858 hypergeometric test. **F**, Scatterplot of log<sub>2</sub>-fold change values over WT of *syd-5* versus  
859 *swi3d-1* at genes that were differentially expressed in *syd-5*. The line of best fit is shown  
860 in red, with adjusted  $R$  value indicated. Dots are mean values from three biologically  
861 independent experiments. **G**, Venn diagrams showing statistically significant overlaps  
862 between the mis-regulated genes targeted by SYD in *swi3d-1* and SYD directs regulated  
863 genes.  $P$  values were determined by hypergeometric test. **H-I**, Gene ontology analysis  
864 of genes co-up- or co-down-regulated in *syd-5* and *swi3d-1*.

865

866 **Figure 5 SWI3D is essential in maintaining SAS sub-complex integrity.** **A**, The  
867 mRNA levels of *SYD-N-GFP* were determined by RT-qPCR in WT and *swi3d-1*  
868 background. *ACTIN2* was amplified as an internal control. Error bars are presented as

869 mean values  $\pm$  s.d. from three biological replicates. **B**, Immunoblot analysis showing  
870 the relative protein levels of SYD-N-GFP in WT and *swi3d-1*. The numbers at the  
871 bottom represent amounts normalized to the loading control, histone H3. WT was used  
872 as a GFP-free control. **C**, Confocal images of root tips showing nuclear localization of  
873 the SYD-N-GFP fusion protein in a WT and a *swi3d-1* background, respectively. The  
874 red fluorescent signal is derived from propidium iodide staining. **D**, Box plot showing  
875 the average fluorescence intensity of SYD-N-GFP in WT and *swi3d-1* mutants. The “*n*  
876 = ” indicates the number of roots used. The boxes indicate the first and third quartiles,  
877 and the lines in the boxes indicate median values. Significant differences were  
878 determined by unpaired, two-tailed Student’s *t*-test. **E**, Unique peptide numbers of SAS  
879 sub-complex subunits identified by IP-MS in *SYD-N-GFP* under WT and *swi3d-1*  
880 background. **F**, Heatmap showing the unique peptides values of representative SAS  
881 sub-complex subunits identified by IP-MS in *SYD-N-GFP* under WT and *swi3d-1*  
882 background. **G**, Number of SYD binding sites (number of peaks or genes) in the WT  
883 and *swi3d-1* background. **H** and **I**, Metagene plot (**H**) and heatmap (**I**) represented the  
884 mean density of SYD occupancy at all SYD-occupied sites in *swi3d-1* compared with  
885 WT. The average SYD binding signals within 3 kb genomic regions flanking SYD peak  
886 summits were shown. **J**, Fold change ( $\log_2$ ) in SYD occupancy between WT and *swi3d-1*  
887 *I* background. Occupancy changes with false discovery rate (FDR)  $<$  0.05 are  
888 highlighted. FDR values are multiple test-corrected Wilcoxon test *P* values, two  
889 biological replicates. **K**, ChIP-qPCR validation of SYD occupancy at representative  
890 target genes using ChIP DNA samples independent from those used for ChIP-seq. The  
891 *AT2G22560* was used as the negative control. Error bars are presented as mean values  
892  $\pm$  s.d. from two biological replicates. Unpaired, two-tailed Student’s *t*-test. **L**, IGV  
893 views of SYD occupancy at selected loci in the WT and *swi3d-1* background. The *y*-  
894 axis scales represent shifted merged MACS2 tag counts for every 10 bp window.

895

896 **Figure 6 The SANT and SWIRM assoc-1 domain are required for maintaining the**  
897 **stability of SWI3D protein.** **A**, Schematic illustration of the SWI3D protein and its  
898 truncated versions. **B**, Leaf phenotype of 21-day-old seedlings. Scale bars, 1 cm. **C**,

899 Western blot analysis using an anti-GFP antibody shows the accumulation of SWI3D  
900 protein and its truncated versions. For each plot, the antibody used is indicated on the  
901 left, and the sizes of the protein markers are indicated on the right. H3 serves as a  
902 loading control. **D**, Schematic illustration of the the N-terminal of SYD protein, SWI3D  
903 and the different truncated versions of SWI3D. **E**, Y2H assay to examine the direct  
904 interaction between SYD and SWI3D. Growth of transformed yeast on permissive SD<sup>-</sup>  
905 Ade-His-Leu-Trp medium indicate interaction.

906

907 **Figure 7 The ATPase module is required for stability of the core module. A**,  
908 Immunoblot analysis showing the relative protein levels of SWI3D-GFP in WT and  
909 *syd-5* background. The numbers at the bottom represent amounts normalized to the  
910 loading control, histone H3. WT was used as a GFP-free control. **B**, The mRNA levels  
911 of SWI3D-GFP were determined by RT-qPCR in WT and *syd-5* background. *ACTIN2*  
912 was amplified as an internal control. Error bars are presented as mean values  $\pm$  s.d. from  
913 three biological replicates. **C**, Unique peptide numbers of SAS sub-complex subunits  
914 identified by IP-MS in *SWI3D-GFP* under WT and *syd-5* background. **D**, Number of  
915 SWI3D binding sites (number of peaks or genes) in the WT and *syd-5* background. **E**  
916 and **F**, Metagene plot (**E**) and heatmap (**F**) represented the mean density of SWI3D  
917 occupancy at all SWI3D-occupied sites in *syd-5* compared with WT. The average  
918 SWI3D binding signals within 3 kb genomic regions flanking SWI3D peak summits  
919 were shown. **G**, Fold change (log<sub>2</sub>) in SWI3D occupancy between WT and *syd-5*  
920 background. Occupancy changes with false discovery rate (FDR) < 0.05 are highlighted.  
921 FDR values are multiple test-corrected Wilcoxon test *P* values, two biological replicates  
922 per ChIP. **H**, ChIP-qPCR validation of SWI3D occupancy at representative target genes  
923 using ChIP DNA samples independent from those used for ChIP-seq. The *AT2G22560*  
924 was used as the negative control. Error bars are presented as mean values  $\pm$  s.d. from  
925 two biological replicates. Unpaired, two-tailed Student's *t*-test. **I**, IGV views of SWI3D  
926 occupancy at selected loci in the WT and *syd-5* background. The *y*-axis scales represent  
927 shifted merged MACS2 tag counts for every 10 bp window.

928

929 **Supplemental Figure 1 Immuno-purification of three distinct SWI/SNF sub-**  
930 **complexes in Arabidopsis. A-C**, Heatmaps showing the  $\log_2(\text{PSM}+1)$  values of  
931 SWI/SNF complex subunits identified by IP-MS in BRM, SYD and MINU2. **D**, Silver-  
932 stained gel of GFP immunoprecipitations from SWI3C-GFP, SWI3D-GFP and SWI3A-  
933 GFP. WT or *pACTIN2:GFP* were used as a control. **E**, Volcano plots displaying that  
934 SWI/SNF subunits are enriched in GFP immunoprecipitations from corresponding  
935 subunit from two or three independent experiments. *P* values were calculated by two-  
936 tailed Student's t-test. The pan-SWI/SNF subunit and complex specific subunits were  
937 shown in different colors.

938

939 **Supplemental Figure 2 Differential binding of SAS, MAS and BAS sub-complexes**  
940 **on chromatin. A**, Schematic of subunits selected for ChIP-seq: SYD and SWI3D  
941 (SAS-specific), MINU2, SWI3A and BSH (MAS-specific), BRM, SWI3C and  
942 SWP73A (BAS-specific) and SWP73B and BCL7A/B (pan-SWI/SNF) subunits. **B**,  
943 Venn diagrams displaying statistically significant overlaps among genes occupied by  
944 SWI3D, SWI3A or SWI3C with those by SWP73B. **C**, Venn diagrams displaying  
945 statistically significant overlaps among genes occupied by SWI3A, SWI3C and SWI3D.  
946 **D**, Matrix depicting spearman correlation coefficients between ChIP-seq datasets,  
947 calculated using the bin mode (bin size = 1,000). **E**, At the top, ChIP-seq read density  
948 distribution over the TSS and 2.5 kb into the gene body at their co-target genes. At the  
949 bottom, heatmap showing the mean occupancy signals of SYD, MINU2 and BRM. **F-**  
950 **G**, Pie charts (F), metagene plot (G) and heatmap (G) showing the distribution of  
951 SWI3A, SWI3C, SWI3D, SWP73A, BRIP1 and BRIP2 peaks at genic and intergenic  
952 regions in the genome. Green arrows and dashed boxes indicate the gene body. **H**,  
953 Metagene plot representations of the mean occupancy of SYD, SWI3D, MINU2,  
954 SWI3A, BRM and SWI3C at SYD-MINU2-BRM co-target genes. **I**, Metagene plot  
955 representations of the mean occupancy of SYD, SWI3D, MINU2, SWI3A, BRM and  
956 SWI3C at SWI3D-SWI3A-SWI3C co-target genes. **J**, Heatmap showing Gene  
957 ontology analysis of BRM, SYD and MINU2 targets genes.

958



959 **Supplemental Figure 3 Unique target genes bound by SWI3A.** A, Gene ontology  
960 analysis of SWI3A unique target genes. B, Gene ontology analysis of SWI3A, SWI3C  
961 and SWI3D target genes.

962

963 **Supplemental Figure 4 The MAS sub-complex showed a preference for binding to**  
964 **genes involved in the regulation of DNA methylation.** A, Partial list of MINU2 target  
965 genes related to DNA methylation. B-C, Metagene plots displaying the mean  
966 occupancy of MINU2, BRM and SYD at the 416 genes involved in the regulation of  
967 DNA methylation. The 416 genes list were obtained by searching the GO term  
968 “Methylation” at <http://geneontology.org/>. D-G, IGV views of ChIP-seq signals of  
969 MINU2, SWI3A, BRM, SWI3C, SYD and SWI3D at representative genes.

970

971 **Supplemental Figure 5 The MAS and BAS sub-complex, but not SAS sub-complex,**  
972 **show a significant overlap with activate histone modification markers.** A, Metagene  
973 plots displaying the ChIP-seq signals of different histone modifications at SYD,  
974 MINU2 and BRM binding peaks. B, Metagene plots displaying the ChIP-seq signals of  
975 different histone modifications at SYD-MINU2-BRM co-binding and their specific  
976 binding peaks.

977

978 **Supplemental Figure 6** Metagene plots displaying the ChIP-seq signals of different  
979 histone modifications at SWI3D, SWI3A and SWI3C binding peaks.

980

981 **Supplemental Figure 7 Analysis of the overlaps between SYD target genes and**  
982 **mis-regulated genes in *syd-5* or *swi3d-1*.** A, Venn diagrams displaying the overlap  
983 between the genes occupied by SYD and mis-regulated genes in *syd-5*. B, Venn  
984 diagrams displaying the overlap between the genes occupied by SYD and mis-regulated  
985 genes in *swi3d-1*.

986

987 **Supplemental Figure 8 Loss of SWI3D did not affect BRM protein level.**  
988 Immunoblot analysis showing the relative protein levels of BRM-GFP in a WT and

989 *swi3d-1* background. WT was used as a GFP-free control.

990

991 **Supplemental Figure 9 The SANT and SWIRM assoc-1 domain of SWI3D are**

992 **conserved in eukaryotes. A,** The mRNA levels of *SWI3D-GFP* were determined by

993 RT-qPCR in different truncated versions of SWI3D. *ACTIN2* was amplified as an

994 internal control. Error bars are presented as mean values  $\pm$  s.d. from three biological

995 replicates. Lowercase letters indicated significant differences between genetic

996 backgrounds, as determined by the *post hoc* Tukey's HSD test. **B,** The phylogenetic

997 tree and genes structure of SWI3D was constructed using the amino-acid sequences

998 from different species, including *Amborella trichopoda*, *Physcomitrella patens*,

999 *Arabidopsis thaliana*, *Oryza sativa Japonica*, *Zea mays*, *Homo sapiens*, *Drosophila*

1000 *melanogaster*, *Caenorhabditis elegans*, *Schizosaccharomyces pombe*, *Chlamydomonas*

1001 *reinhardtii*, *Selaginella moellendorffii*, *Populus trichocarpa*, *Sorghum bicolor*. The

1002 conserved domains were predicted at the online tool SMART: <https://smart.embl.de>.

1003

1004 **Supplemental Figure 10 The ATPase of BAS sub-complex is essential to the**

1005 **stability of the core module. A,** Unique peptide numbers of BAS sub-complex

1006 subunits identified by IP-MS in *SWI3C-GFP* under WT and *brm-1* background. **B,**

1007 Heatmap showing the  $\log_2(\text{PSM}+1)$  values of representative BAS sub-complex

1008 subunits identified by IP-MS in *SWI3C-GFP* under WT and *brm-1* background.

1009

1010 **Supplemental Figure 11 The residual peaks of SWI3D enriched at high chromatin**

1011 **accessibility regions. A,** Venn diagram displaying the overlap SWI3D peaks that lost

1012 and maintained in *syd-5* mutant background. **B,** Metagene plot and heatmap

1013 representing the mean density of the ATAC-seq signals of WT at SWI3D peaks that lost

1014 and maintained in *syd-5*.

1015

1016 **Supplemental Figure 12 The possible combinations of the SAS, MAS and BAS sub-**

1017 **complexes.**

1018

1019 **References**

- 1020 **Archacki, R., Sarnowski, T.J., Halibart-Puzio, J., Brzeska, K., Buszewicz, D., Prymakowska-**  
1021 **Bosak, M., Koncz, C., and Jerzmanowski, A.** (2009). Genetic analysis of functional  
1022 redundancy of BRM ATPase and ATSWI3C subunits of Arabidopsis SWI/SNF chromatin  
1023 remodelling complexes. *Planta* **229**, 1281-1292.
- 1024 **Bezhani, S., Winter, C., Hershman, S., Wagner, J.D., Kennedy, J.F., Kwon, C.S., Pfluger, J., Su,**  
1025 **Y., and Wagner, D.** (2007). Unique, shared, and redundant roles for the Arabidopsis  
1026 SWI/SNF chromatin remodeling ATPases BRAHMA and SPLAYED. *Plant Cell* **19**, 403-416.
- 1027 **Clapier, C.R., and Cairns, B.R.** (2009). The biology of chromatin remodeling complexes. *Annu Rev*  
1028 *Biochem* **78**, 273-304.
- 1029 **Clapier, C.R., Iwasa, J., Cairns, B.R., and Peterson, C.L.** (2017). Mechanisms of action and  
1030 regulation of ATP-dependent chromatin-remodelling complexes. *Nat Rev Mol Cell Biol*  
1031 **18**, 407-422.
- 1032 **Clough, S.J., and Bent, A.F.** (1998). Floral dip: a simplified method for *Agrobacterium*-mediated  
1033 transformation of *Arabidopsis thaliana*. *Plant J* **16**, 735-743.
- 1034 **Curtis, M.D., and Grossniklaus, U.** (2003). A gateway cloning vector set for high-throughput  
1035 functional analysis of genes in planta. *Plant Physiol.* **133**, 462-469.
- 1036 **Diego-Martin, B., Perez-Aleman, J., Candela-Ferre, J., Corbalan-Acedo, A., Pereyra, J.,**  
1037 **Alabadi, D., Jami-Alahmadi, Y., Wohlschlegel, J., and Gallego-Bartolome, J.** (2022).  
1038 The TRIPLE PHD FINGERS proteins are required for SWI/SNF complex-mediated +1  
1039 nucleosome positioning and transcription start site determination in *Arabidopsis*. *Nucleic*  
1040 *Acids Res* **50**, 10399-10417.
- 1041 **Dutta, A., Sardi, M., Gogol, M., Gilmore, J., Zhang, D., Florens, L., Abmayr, S.M., Washburn,**  
1042 **M.P., and Workman, J.L.** (2017). Composition and function of mutant Swi/Snf complexes.  
1043 *Cell Rep* **18**, 2124-2134.
- 1044 **Farrona, S., Hurtado, L., Bowman, J.L., and Reyes, J.C.** (2004). The *Arabidopsis thaliana* SNF2  
1045 homolog AtBRM controls shoot development and flowering. *Development* **131**, 4965-  
1046 4975.
- 1047 **Feng, J., Liu, T., Qin, B., Zhang, Y., and Liu, X.S.** (2012). Identifying ChIP-seq enrichment using  
1048 MACS. *Nat Protoc* **7**, 1728-1740.
- 1049 **Freese, N.H., Norris, D.C., and Loraine, A.E.** (2016). Integrated genome browser: visual analytics  
1050 platform for genomics. *Bioinformatics* **32**, 2089-2095.
- 1051 **Gatchalian, J., Malik, S., Ho, J., Lee, D.S., Kelso, T.W.R., Shokhirev, M.N., Dixon, J.R., and**  
1052 **Hargreaves, D.C.** (2018). A non-canonical BRD9-containing BAF chromatin remodeling  
1053 complex regulates naive pluripotency in mouse embryonic stem cells. *Nat Commun* **9**,  
1054 5139.
- 1055 **Gendrel, A.V., Lippman, Z., Martienssen, R., and Colot, V.** (2005). Profiling histone modification  
1056 patterns in plants using genomic tiling microarrays. *Nat Methods* **2**, 213-218.
- 1057 **Hargreaves, D.C., and Crabtree, G.R.** (2011). ATP-dependent chromatin remodeling: genetics,  
1058 genomics and mechanisms. *Cell Res* **21**, 396-420.
- 1059 **Ho, L., and Crabtree, G.R.** (2010). Chromatin remodelling during development. *Nature* **463**, 474-  
1060 484.
- 1061 **Huang, C.Y., Rangel, D.S., Qin, X., Bui, C., Li, R., Jia, Z., Cui, X., and Jin, H.** (2021). The chromatin-  
1062 remodeling protein BAF60/SWP73A regulates the plant immune receptor NLRs. *Cell Host*

- 1063 Microbe **29**, 425-434.
- 1064 **Hurtado, L., Farrona, S., and Reyes, J.C.** (2006). The putative SWI/SNF complex subunit BRAHMA  
1065 activates flower homeotic genes in *Arabidopsis thaliana*. *Plant Mol Biol* **62**, 291-304.
- 1066 **Kim, D., Pertea, G., Trapnell, C., Pimentel, H., Kelley, R., and Salzberg, S.L.** (2013). TopHat2:  
1067 accurate alignment of transcriptomes in the presence of insertions, deletions and gene  
1068 fusions. *Genome Biol* **14**, R36.
- 1069 **Langmead, B., and Salzberg, S.L.** (2012). Fast gapped-read alignment with Bowtie 2. *Nat.*  
1070 *Methods* **9**, 357-359.
- 1071 **Law, J.A., Du, J., Hale, C.J., Feng, S., Krajewski, K., Palanca, A.M., Strahl, B.D., Patel, D.J., and**  
1072 **Jacobsen, S.E.** (2013). Polymerase IV occupancy at RNA-directed DNA methylation sites  
1073 requires SHH1. *Nature* **498**, 385-389.
- 1074 **Li, C., Chen, C., Gao, L., Yang, S., Nguyen, V., Shi, X., Siminovitch, K., Kohalmi, S.E., Huang, S.,**  
1075 **Wu, K., Chen, X., and Cui, Y.** (2015). The *Arabidopsis* SWI2/SNF2 chromatin remodeler  
1076 BRAHMA regulates polycomb function during vegetative development and directly  
1077 activates the flowering repressor gene SVP. *PLoS Genet* **11**, e1004944.
- 1078 **Li, C., Gu, L., Gao, L., Chen, C., Wei, C.Q., Qiu, Q., Chien, C.W., Wang, S., Jiang, L., Ai, L.F., Chen,**  
1079 **C.Y., Yang, S., Nguyen, V., Qi, Y., Snyder, M.P., Burlingame, A.L., Kohalmi, S.E., Huang,**  
1080 **S., Cao, X., Wang, Z.Y., Wu, K., Chen, X., and Cui, Y.** (2016). Concerted genomic targeting  
1081 of H3K27 demethylase REF6 and chromatin-remodeling ATPase BRM in *Arabidopsis*. *Nat*  
1082 *Genet* **48**, 687-693.
- 1083 **Livak, K.J., and Schmittgen, T.D.** (2001). Analysis of relative gene expression data using real-time  
1084 quantitative PCR and the 2<sup>-Delta Delta C(T)</sup> Method. *Methods* **25**, 402-408.
- 1085 **Mashtalir, N., D'Avino, A.R., Michel, B.C., Luo, J., Pan, J., Otto, J.E., Zullow, H.J., McKenzie, Z.M.,**  
1086 **Kubiak, R.L., St Pierre, R., Valencia, A.M., Poynter, S.J., Cassel, S.H., Ranish, J.A., and**  
1087 **Kadoch, C.** (2018). Modular organization and assembly of SWI/SNF family chromatin  
1088 remodeling complexes. *Cell* **175**, 1272-1288
- 1089 **Michel, B.C., D'Avino, A.R., Cassel, S.H., Mashtalir, N., McKenzie, Z.M., McBride, M.J., Valencia,**  
1090 **A.M., Zhou, Q., Bocker, M., Soares, L.M.M., Pan, J., Remillard, D.I., Lareau, C.A., Zullow,**  
1091 **H.J., Fortoul, N., Gray, N.S., Bradner, J.E., Chan, H.M., and Kadoch, C.** (2018). A non-  
1092 canonical SWI/SNF complex is a synthetic lethal target in cancers driven by BAF complex  
1093 perturbation. *Nat Cell Biol* **20**, 1410-1420.
- 1094 **Mlynarova, L., Nap, J.P., and Bisseling, T.** (2007). The SWI/SNF chromatin-remodeling gene  
1095 AtCHR12 mediates temporary growth arrest in *Arabidopsis thaliana* upon perceiving  
1096 environmental stress. *Plant J* **51**, 874-885.
- 1097 **Pan, J., McKenzie, Z.M., D'Avino, A.R., Mashtalir, N., Lareau, C.A., St Pierre, R., Wang, L.,**  
1098 **Shilatifard, A., and Kadoch, C.** (2019). The ATPase module of mammalian SWI/SNF family  
1099 complexes mediates subcomplex identity and catalytic activity-independent genomic  
1100 targeting. *Nat Genet* **51**, 618-626.
- 1101 **Ramirez, F., Ryan, D.P., Gruning, B., Bhardwaj, V., Kilpert, F., Richter, A.S., Heyne, S., Dundar,**  
1102 **F., and Manke, T.** (2016). deepTools2: a next generation web server for deep-sequencing  
1103 data analysis. *Nucleic Acids Res* **44**, W160-165.
- 1104 **Ramírez, F., Ryan, D.P., and Gruning, B.** (2016). deepTools2: a next generation web server for  
1105 deep-sequencing data analysis. *Nucleic Acids Res.* **44**, W160-165.
- 1106 **Robinson, J.T., Thorvaldsdottir, H., Winckler, W., Guttman, M., Lander, E.S., Getz, G., and**

- 1107 **Mesirov, J.P.** (2011). Integrative genomics viewer. *Nat. Biotechnol.* **29**, 24-26.
- 1108 **Ross-Innes, C.S., Stark, R., Teschendorff, A.E., Holmes, K.A., Ali, H.R., Dunning, M.J., Brown,**  
1109 **G.D., Gojis, O., Ellis, I.O., Green, A.R., Ali, S., Chin, S.F., Palmieri, C., Caldas, C., and**  
1110 **Carroll, J.S.** (2012). Differential oestrogen receptor binding is associated with clinical  
1111 outcome in breast cancer. *Nature* **481**, 389-393.
- 1112 **Ryan, D.P., and Owen-Hughes, T.** (2011). Snf2-family proteins: chromatin remodellers for any  
1113 occasion. *Curr Opin Chem Biol* **15**, 649-656.
- 1114 **Sacharowski, S.P., Gratkowska, D.M., Sarnowska, E.A., Kondrak, P., Jancewicz, I., Porri, A.,**  
1115 **Bucior, E., Rolicka, A.T., Franzen, R., Kowalczyk, J., Pawlikowska, K., Huettel, B., Torti,**  
1116 **S., Schmelzer, E., Coupland, G., Jerzmanowski, A., Koncz, C., and Sarnowski, T.J.** (2015).  
1117 SWP73 subunits of Arabidopsis SWI/SNF chromatin remodeling complexes play distinct  
1118 roles in leaf and flower development. *Plant Cell* **27**, 1889-1906.
- 1119 **Sang, Y., Silva-Ortega, C.O., Wu, S., Yamaguchi, N., Wu, M.F., Pfluger, J., Gillmor, C.S.,**  
1120 **Gallagher, K.L., and Wagner, D.** (2012). Mutations in two non-canonical Arabidopsis  
1121 SWI2/SNF2 chromatin remodeling ATPases cause embryogenesis and stem cell  
1122 maintenance defects. *Plant J* **72**, 1000-1014.
- 1123 **Sarnowska, E., Gratkowska, D.M., Sacharowski, S.P., Cwiek, P., Tohge, T., Fernie, A.R., Siedlecki,**  
1124 **J.A., Koncz, C., and Sarnowski, T.J.** (2016). The Role of SWI/SNF Chromatin Remodeling  
1125 Complexes in Hormone Crosstalk. *Trends Plant Sci* **21**, 594-608.
- 1126 **Sarnowski, T.J., Rios, G., Jasik, J., Swiezewski, S., Kaczanowski, S., Li, Y., Kwiatkowska, A.,**  
1127 **Pawlikowska, K., Kozbial, M., Kozbial, P., Koncz, C., and Jerzmanowski, A.** (2005). SWI3  
1128 subunits of putative SWI/SNF chromatin-remodeling complexes play distinct roles during  
1129 Arabidopsis development. *Plant Cell* **17**, 2454-2472.
- 1130 **Shu, J., Chen, C., Li, C., Thapa, R.K., Song, J., Xie, X., Nguyen, V., Bian, S., Liu, J., Kohalmi, S.E.,**  
1131 **and Cui, Y.** (2021). Genome-wide occupancy of Arabidopsis SWI/SNF chromatin  
1132 remodeler SPLAYED provides insights into its interplay with its close homolog BRAHMA  
1133 and Polycomb proteins. *Plant J* **106**, 200-213.
- 1134 **Smith, C.L., Horowitz-Scherer, R., Flanagan, J.F., Woodcock, C.L., and Peterson, C.L.** (2003).  
1135 Structural analysis of the yeast SWI/SNF chromatin remodeling complex. *Nat Struct Biol*  
1136 **10**, 141-145.
- 1137 **Snelders, N.C., Rovenich, H., Petti, G.C., Rocafort, M., van den Berg, G.C.M., Vorholt, J.A.,**  
1138 **Mesters, J.R., Seidl, M.F., Nijland, R., and Thomma, B.** (2020). Microbiome manipulation  
1139 by a soil-borne fungal plant pathogen using effector proteins. *Nat Plants* **6**, 1365-1374.
- 1140 **Tamura, K., Stecher, G., and Kumar, S.** (2021). MEGA11: Molecular Evolutionary Genetics Analysis  
1141 Version 11. *Mol Biol Evol* **38**, 3022-3027.
- 1142 **Tran, K.D., Chakravarty, T., Garzon, J.L., Saraf, A., Florens, L., Washburn, M.P., and Dutta, A.**  
1143 (2022). Hypoxic response is driven by the BAF form of SWI/SNF.
- 1144 **Trapnell, C., Roberts, A., Goff, L., Pertea, G., Kim, D., Kelley, D.R., Pimentel, H., Salzberg, S.L.,**  
1145 **Rinn, J.L., and Pachter, L.** (2012). Differential gene and transcript expression analysis of  
1146 RNA-seq experiments with TopHat and Cufflinks. *Nat Protoc* **7**, 562-578.
- 1147 **Tyanova, S., Temu, T., and Cox, J.** (2016a). The MaxQuant computational platform for mass  
1148 spectrometry-based shotgun proteomics. *Nat Protoc* **11**, 2301-2319.
- 1149 **Tyanova, S., Temu, T., Sinitcyn, P., Carlson, A., Hein, M.Y., Geiger, T., Mann, M., and Cox, J.**  
1150 (2016b). The Perseus computational platform for comprehensive analysis of (prote)omics

- 1151 data. *Nat Methods* **13**, 731-740.
- 1152 **Wagner D, M.E.** (2002). SPLAYED, a novel SWI/SNF ATPase homolog, controls reproductive  
1153 development in Arabidopsis. *Curr Biol.* **12**, 85-94.
- 1154 **Wagner, F.R., Dienemann, C., Wang, H., Stutzer, A., Tegunov, D., Urlaub, H., and Cramer, P.**  
1155 (2020). Structure of SWI/SNF chromatin remodeller RSC bound to a nucleosome. *Nature*  
1156 **579**, 448-451.
- 1157 **Wang, Z., Yuan, T., Yuan, C., Niu, Y., Sun, D., and Cui, S.** (2009). LFR, which encodes a novel  
1158 nuclear-localized Armadillo-repeat protein, affects multiple developmental processes in  
1159 the aerial organs in Arabidopsis. *Plant Mol Biol* **69**, 121-131.
- 1160 **Wu, M.F., Yamaguchi, N., Xiao, J., Bargmann, B., Estelle, M., Sang, Y., and Wagner, D.** (2015).  
1161 Auxin-regulated chromatin switch directs acquisition of flower primordium founder fate.  
1162 *Elife* **4**, e09269.
- 1163 **Xu, Y., Guo, C., Zhou, B., Li, C., Wang, H., Zheng, B., Ding, H., Zhu, Z., Peragine, A., Cui, Y.,**  
1164 **Poethig, S., and Wu, G.** (2016). Regulation of vegetative phase change by SWI2/SNF2  
1165 chromatin remodeling ATPase BRAHMA. *Plant Physiol* **172**, 2416-2428.
- 1166 **Yang, J., Yuan, L., Yen, M.R., Zheng, F., Ji, R., Peng, T., Gu, D., Yang, S., Cui, Y., Chen, P.Y., Wu,**  
1167 **K., and Liu, X.** (2020). SWI3B and HDA6 interact and are required for transposon silencing  
1168 in Arabidopsis. *Plant J* **102**, 809-822.
- 1169 **Yang, S., Li, C., Zhao, L., Gao, S., Lu, J., Zhao, M., Chen, C.Y., Liu, X., Luo, M., Cui, Y., Yang, C.,**  
1170 **and Wu, K.** (2015). The Arabidopsis SWI2/SNF2 chromatin remodeling ATPase BRAHMA  
1171 targets directly to PINs and is required for root stem cell niche maintenance. *Plant Cell* **27**,  
1172 1670-1680.
- 1173 **Yu, G., Wang, L.G., and He, Q.Y.** (2015). ChIPseeker: an R/Bioconductor package for ChIP peak  
1174 annotation, comparison and visualization. *Bioinformatics* **31**, 2382-2383.
- 1175 **Yu, Y., Fu, W., Xu, J., Lei, Y., Song, X., Liang, Z., Zhu, T., Liang, Y., Hao, Y., Yuan, L., and Li, C.**  
1176 (2021). Bromodomain-containing proteins BRD1, BRD2, and BRD13 are core subunits of  
1177 SWI/SNF complexes and vital for their genomic targeting in Arabidopsis. *Mol Plant* **14**,  
1178 888-904.
- 1179 **Yu, Y., Liang, Z., Song, X., Fu, W., Xu, J., Lei, Y., Yuan, L., Ruan, J., Chen, C., Fu, W., Cui, Y.,**  
1180 **Huang, S., and Li, C.** (2020). BRAHMA-interacting proteins BRIP1 and BRIP2 are core  
1181 subunits of Arabidopsis SWI/SNF complexes. *Nat Plants* **6**, 996-1007.
- 1182 **Zhang, H., Ma, Z.Y., Zeng, L., Tanaka, K., Zhang, C.J., Ma, J., Bai, G., Wang, P., Zhang, S.W., Liu,**  
1183 **Z.W., Cai, T., Tang, K., Liu, R., Shi, X., He, X.J., and Zhu, J.K.** (2013). DTF1 is a core  
1184 component of RNA-directed DNA methylation and may assist in the recruitment of Pol  
1185 IV. *Proc Natl Acad Sci U S A* **110**, 8290-8295.
- 1186 **Zhao, M., Yang, S., Chen, C.Y., Li, C., Shan, W., Lu, W., Cui, Y., Liu, X., and Wu, K.** (2015).  
1187 Arabidopsis BREVIPEDICELLUS interacts with the SWI2/SNF2 chromatin remodeling  
1188 ATPase BRAHMA to regulate KNAT2 and KNAT6 expression in control of inflorescence  
1189 architecture. *PLoS Genet* **11**, e1005125.
- 1190 **Zhao, S., Zhang, B., Yang, M., Zhu, J., and Li, H.** (2018). Systematic Profiling of Histone Readers  
1191 in Arabidopsis thaliana. *Cell Rep* **22**, 1090-1102.
- 1192

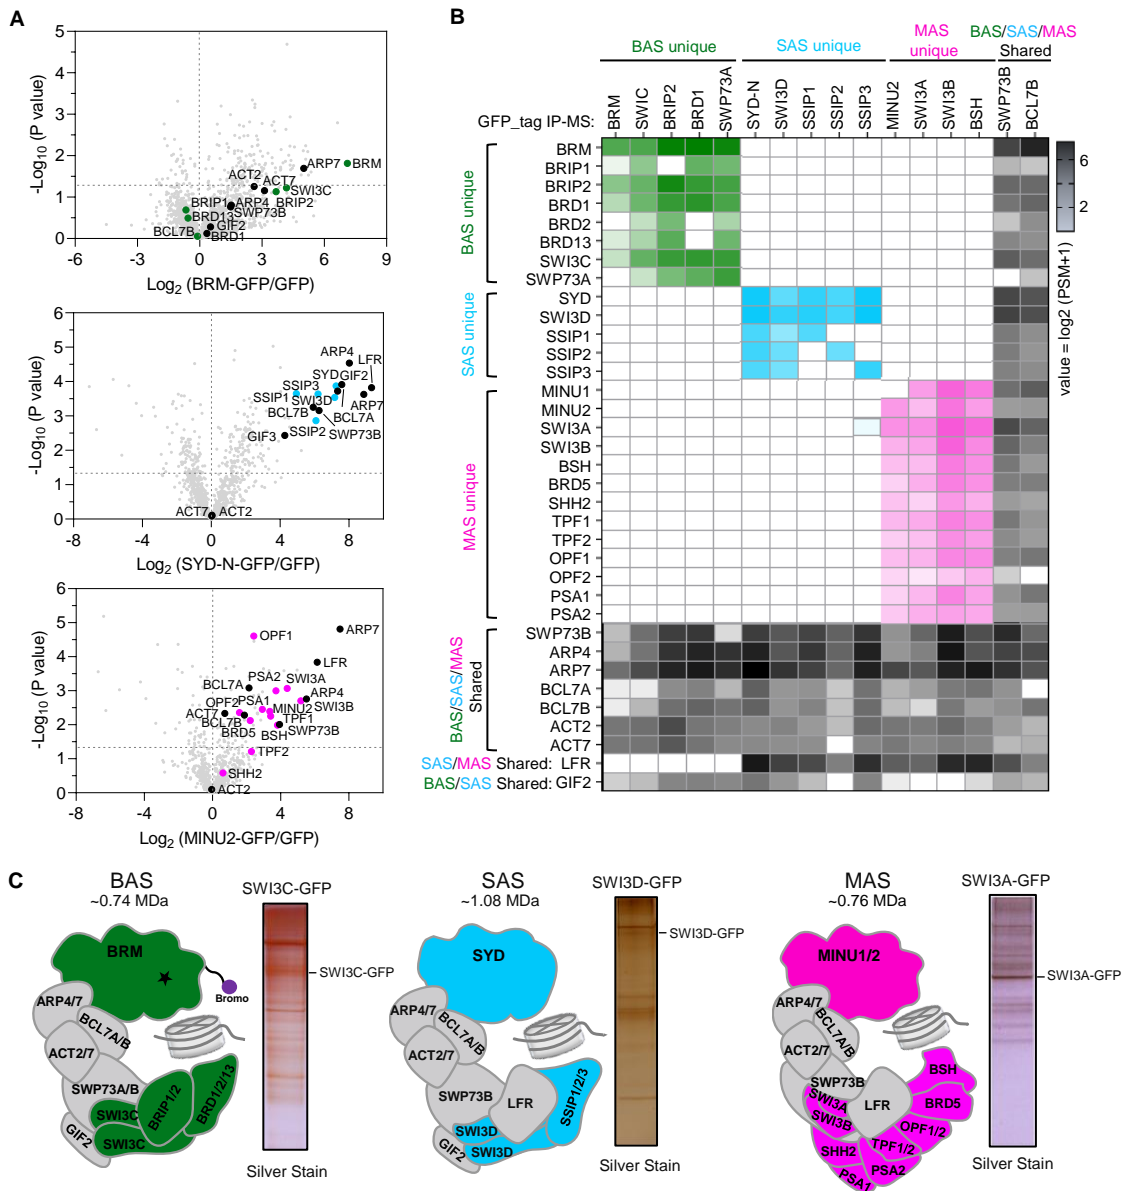

**Figure 1 Three distinct SWI/SNF sub-complexes in *Arabidopsis*.** **A**, Volcano plots displaying SWI/SNF subunits that are enriched in GFP immunoprecipitations from BRM-GFP, SYD-GFP, MINU2-GFP relative to GFP from two independent experiments.  $P$  values were calculated by two-tailed Student's  $t$ -test. Subunits of the *Arabidopsis* SWI/SNF complexes are highlighted using green dots (BRM unique subunits), blue dots (SYD unique subunits), magenta dots (MINU2 unique subunits) and black dots (BRM, SYD and MINU2 shared subunits). **B**, Heatmap showing the mean  $\log_2(\text{PSM}+1)$  values (from two biological replications) of SWI/SNF complex subunits identified by IP-MS in BRM, SWI3C, BRIP2, BRD1, SWP73A, SYD-N, SWI3D, SSIP1/2/3, MINU2, SWI3A, SWI3B, BSH, SWP73B and BCL7B. **C**, Diagrams showing the organization of BAS, SAS and MAS complexes, respectively. Silver-stained gels of GFP immunoprecipitations from SWI3C-GFP, SWI3D-GFP and SWI3A-GFP were shown. The specific subunits of each sub-complex were marked with different colors, and the common subunits of different sub-complexes were marked with gray.

**A**

|                | <i>Saccharomyces cerevisiae</i>            |                                                             | <i>Homo sapiens</i> |                  |                  | <i>Arabidopsis thaliana</i> |               |                |
|----------------|--------------------------------------------|-------------------------------------------------------------|---------------------|------------------|------------------|-----------------------------|---------------|----------------|
|                | Swi/Snf                                    | RSC                                                         | cBAF                | PBAF             | ncBAF            | BAS (ncBAF)                 | SAS           | MAS            |
| SMARCA2/4      | Snf2                                       | Sth1                                                        | BRM/BRG1            | BRM/BRG1         | BRM/BRG1         | BRM                         | SYD           | MINU1/MINU2    |
| SMARCB         | Snf5                                       | Sfh1                                                        | BAF47               | BAF47            |                  |                             |               | BSH            |
| SMARCC         | Swi3                                       | Rsc8                                                        | BAF155<br>BAF170    | BAF155<br>BAF170 | BAF155<br>BAF170 | SWI3C                       | SWI3D         | SWI3A<br>SWI3B |
| SMARCD         | Snf12                                      | Rsc6                                                        | BAF60A/B/C          | BAF60A/B/C       | BAF60A           | SWP73A/SWP73B               | SWP73B        | SWP73B         |
| SMARCE         |                                            |                                                             | BAF57               | BAF57            |                  |                             |               |                |
| SMARCF         | Swi1                                       | Rsc9                                                        | ARID1A/B            | ARID2            |                  |                             | LFR           | LFR            |
| SMARCG         | Swp82                                      | Rsc7                                                        | DPF1/2/3            | PHF10            |                  |                             |               | TPF1/2, OPF1/2 |
| SMARCH         |                                            | Rsc1/2/4                                                    |                     | pBRM1            |                  |                             |               |                |
| SMARCI         |                                            |                                                             |                     | BRD7             | BRD9             | BRD1/2/13                   |               | BRD5           |
| SMAR CJ        |                                            |                                                             | BCL7A/B/C           | BCL7A/B/C        | BCL7A/B/C        | BCL7A/B                     | BCL7A/B       | BCL7A/B        |
| SMARCK         |                                            |                                                             |                     |                  | GLTSCR1/1L       | BRIP1/2                     |               |                |
| SMARCL         |                                            |                                                             | SS18/L1             |                  | SS18/L1          | GIF2                        | GIF2          |                |
| SMARCM         |                                            |                                                             | BCL11A/B            | BCL11A/B         |                  |                             |               |                |
| SMARCN         | ARP7/ARP9                                  | ARP7/ARP9                                                   | ACTL6A/B            | ACTL6A/B         | ACTL6A/B         | ARP4/ARP7                   | ARP4/ARP7     | ARP4/ARP7      |
|                |                                            |                                                             | ACTB (O)            | ACTB (O)         | ACTB (O)         | ACTIN2/7 (O)                | ACTIN2/7 (O)  | ACTIN2/7 (O)   |
| Plant specific |                                            |                                                             |                     |                  |                  |                             |               | PSA1(P)        |
|                |                                            |                                                             |                     |                  |                  |                             |               | PSA2(Q)        |
|                |                                            |                                                             |                     |                  |                  |                             | SSIP1/2/3 (S) | SHH2 (R)       |
| Yeast specific | Rtt102(T),<br>Snf6, Snf11,<br>Taf14(U1-U3) | Rtt102 (T),<br>Htt1, Rsc58,<br>Rsc3, RSC30,<br>Ldb7 (V1-V5) |                     |                  |                  |                             |               |                |

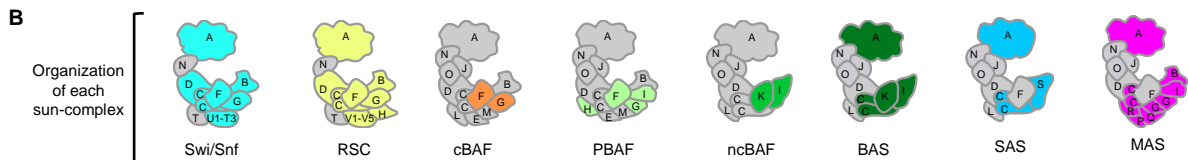

**Figure 2 Comparison of subunit composition of SWI/SNF complexes in *Saccharomyces cerevisiae*, *Homo sapiens* and *Arabidopsis thaliana*.** **A**, SWI/SNF sub-complex components in the three species. The *SMARC* names correspond to lineage-specific subunits previously identified (Hernández-García et al., 2022) and the characters in brackets represent different protein modules. **B**, Diagrams displaying the subunits composition of different SWI/SNF sub-complexes in eukaryotes. The specific subunits of each complex were highlighted by different colors, and the common subunits of different sub-complexes of the same species were marked with gray.



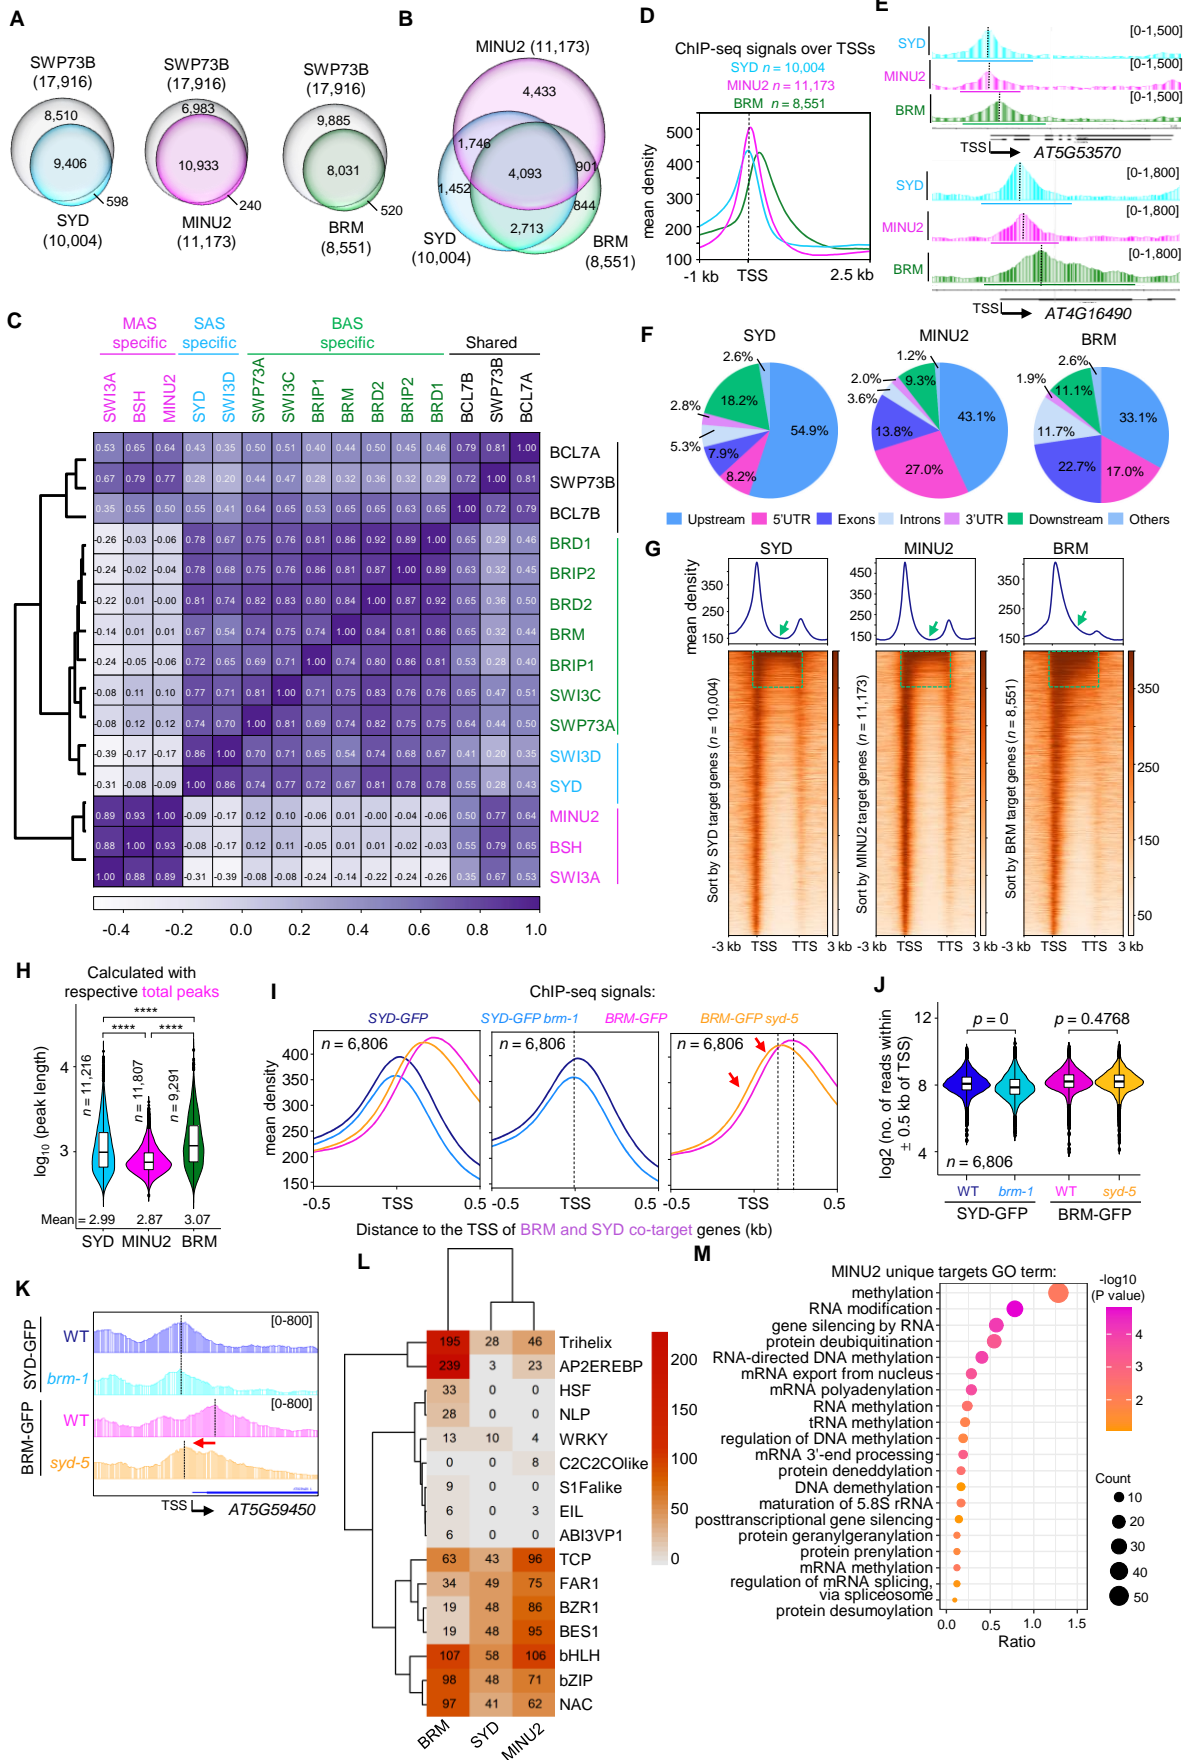

**Figure 3 SAS, MAS and BAS sub-complexes show differential binding patterns in genome-wide. A,** Venn diagrams displaying statistically significant overlaps among genes occupied by SYD, MINU2 or BRM with those by SWP73B. *P* values were calculated by the hypergeometric test. **B,** Venn diagram displaying statistically significant overlaps among genes occupied by SYD, MINU2 and BRM. *P* values were calculated by the hypergeometric test. **C,** Heatmap representing correlations between normalized ChIP-seq reads over a merged set of all SWI/SNF subunit peaks. **D,** SYD, MINU2, and BRM complex ChIP-seq read density distribution over the TSS and 2.5 kb into the gene body at their target genes. **E,** IGV views of ChIP-seq signals of SYD, MINU2 and BRM at representative genes. The dash lines indicated the peak summits. **F,** Pie charts showing the distribution of SYD, MINU2 and BRM peaks at genic and intergenic regions in the genome. **G,** Metagene plot and heatmap display the distribution of SYD, MINU2 and BRM peaks at genic and intergenic regions in the genome. **H,** Violin plots depicting the  $\log_{10}$ (peak length) of SYD, MINU2 or BRM at their corresponding peaks. *P* values are from two-tailed Mann-Whitney *U* test. **I,** Metagene plot showing the mean occupancy of SYD or BRM at their co-target genes. **J,** Violin plots depicting the  $\log_2$  (no. of reads within  $\pm 0.5$  kb of TSS of BRM-GFP and SYD-GFP at their co-target genes, *P* values were determined by the two-tailed Mann-Whitney *U* test. **K,** IGV views of ChIP-seq signals of BRM and SYD at representative genes. The diagrams underneath indicate gene structure. The y-axis scales represent shifted merged MACS2 tag counts for every 10-bp window. **L,** Heatmap of CentriMo log adjusted p-values for top motifs returned by MEME-ChIP analysis for each ChIP-seq experiment. P-values were calculated using binomial test. The sequence covering 250 bp (SYD and MINU2) or 400 bp (BRM) on either sides of each peak summit were used. **M,** Gene ontology analysis of MINU2 specific targets genes.

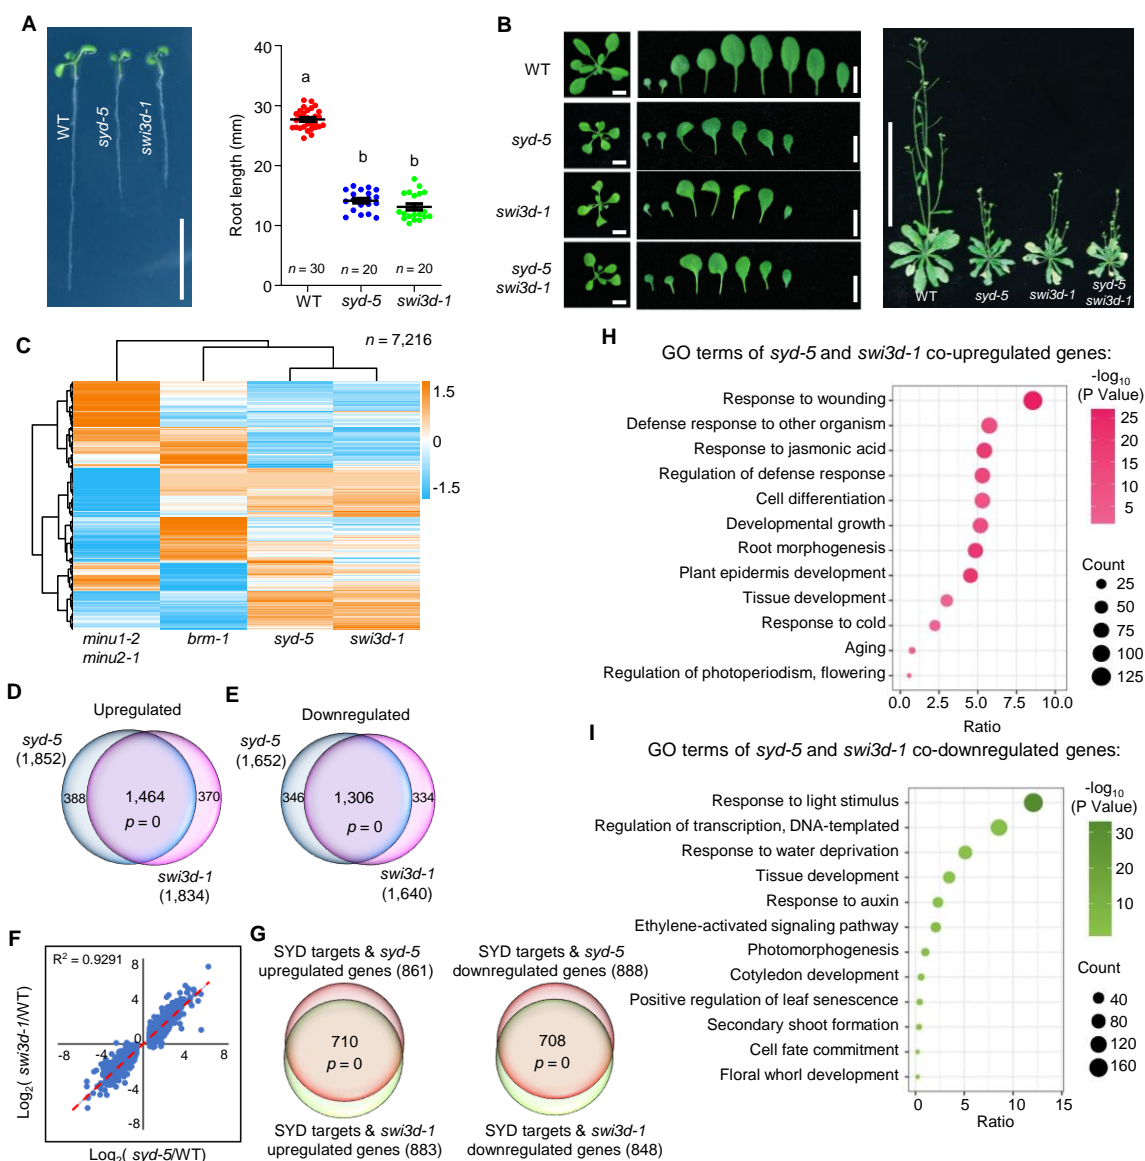

**Figure 4 SWI3D and SYD co-regulate gene expression.** **A**, root length of 7-day-old seedlings. Scale bars, 1 cm. Lowercase letters indicate significant differences between genetic backgrounds, as determined by the post hoc Tukey's HSD test. The number of "n =" indicates the number of plants that were used. Data are presented as mean  $\pm$  s.d.. **B**, Left, leaf phenotype of 21-day-old seedlings. Scale bars, 1 cm. Right, seedlings phenotype of 40-day-old seedlings. Scale bars, 10 cm. **C**, Heatmap showing hierarchical clustering of differentially expressed genes in different mutants (total mis-regulated genes, 7,216). **D-E**, Venn diagrams showing statistically significant overlaps between genes up- or downregulated in *syd-5* and those in *swi3d-1*.  $P = 0$ , hypergeometric test. **F**, Scatterplot of  $\log_2$ -fold change values over WT of *syd-5* versus *swi3d-1* at genes that were differentially expressed in *syd-5*. The line of best fit is shown in red, with adjusted  $R$  value indicated. Dots are mean values from three biologically independent experiments. **G**, Venn diagrams showing statistically significant overlaps between the mis-regulated genes targeted by SYD in *swi3d-1* and SYD directly regulated genes.  $P$  values were determined by hypergeometric test. **H-I**, Gene ontology analysis of genes co-up- or co-down-regulated in *syd-5* and *swi3d-1*.

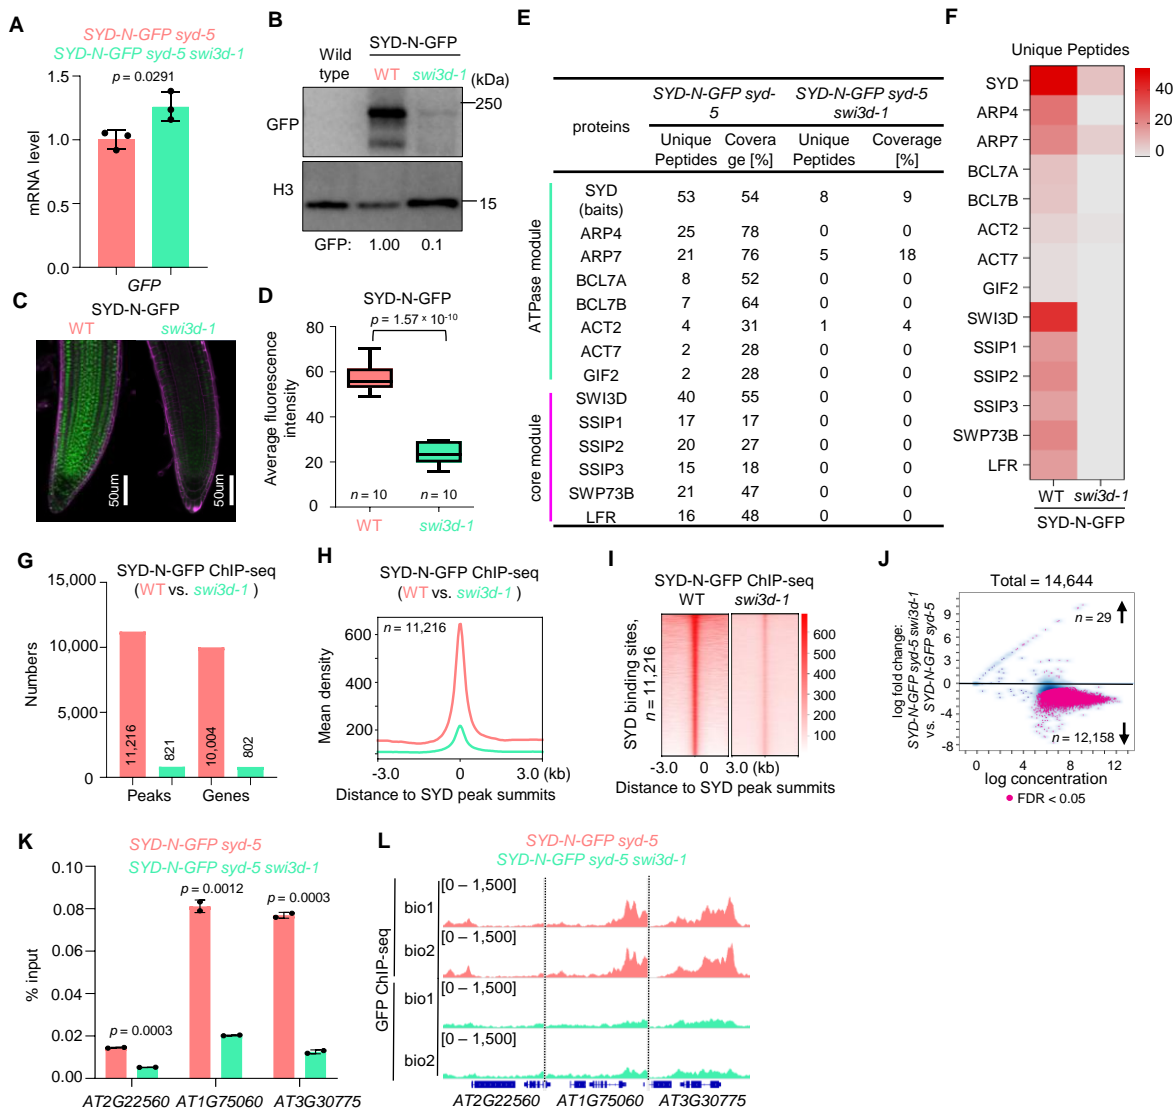

**Figure 5 SWI3D is essential in maintaining SAS sub-complex integrity.** **A**, The mRNA levels of *SYD-N-GFP* were determined by RT-qPCR in WT and *swi3d-1* background. *ACTIN2* was amplified as an internal control. Error bars are presented as mean values  $\pm$  s.d. from three biological replicates. **B**, Immunoblot analysis showing the relative protein levels of SYD-N-GFP in WT and *swi3d-1*. The numbers at the bottom represent amounts normalized to the loading control, histone H3. WT was used as a GFP-free control. **C**, Confocal images of root tips showing nuclear localization of the SYD-N-GFP fusion protein in a WT and a *swi3d-1* background, respectively. The red fluorescent signal is derived from propidium iodide staining. **D**, Box plot showing the average fluorescence intensity of SYD-N-GFP in WT and *swi3d-1* mutants. The “*n* = ” indicates the number of roots used. The boxes indicate the first and third quartiles, and the lines in the boxes indicate median values. Significant differences were determined by unpaired, two-tailed Student’s *t*-test. **E**, Unique peptide numbers of SAS sub-complex subunits identified by IP-MS in *SYD-N-GFP* under WT and *swi3d-1* background. **F**, Heatmap showing the unique peptides values of representative SAS sub-complex subunits identified by IP-MS in *SYD-N-GFP* under WT and *swi3d-1* background. **G**, Number of SYD binding sites (number of peaks or genes) in the WT and *swi3d-1* background. **H** and **I**, Metagene plot (**H**) and heatmap (**I**) represented the mean density of SYD occupancy at all SYD-occupied sites in *swi3d-1* compared with WT. The average SYD binding signals within 3 kb genomic regions flanking SYD peak summits were shown. **J**, Fold change ( $\log_2$ ) in SYD occupancy between WT and *swi3d-1* background. Occupancy changes with false discovery rate (FDR)  $<$  0.05 are highlighted. FDR values are multiple test-corrected Wilcoxon test *P* values, two biological replicates. **K**, ChIP-qPCR validation of SYD occupancy at representative target genes using ChIP DNA samples independent from those used for ChIP-seq. The *AT2G22560* was used as the negative control. Error bars are presented as mean values  $\pm$  s.d. from two biological replicates. Unpaired, two-tailed Student’s *t*-test. **L**, IGV views of SYD occupancy at selected loci in the WT and *swi3d-1* background. The *y*-axis scales represent shifted merged MACS2 tag counts for every 10 bp window.

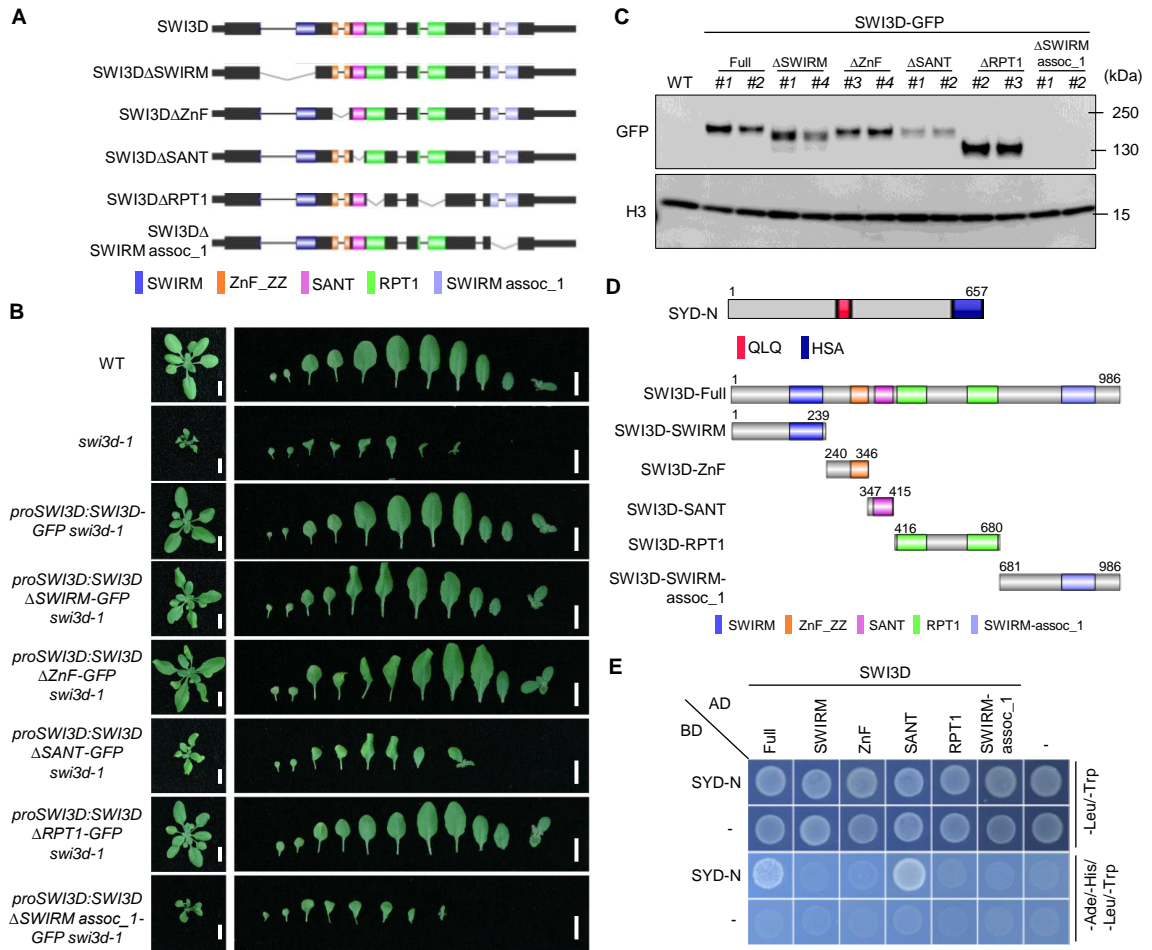

**Figure 6 The SANT and SWIRM assoc-1 domain are required for maintaining the stability of SWI3D protein.** **A**, Schematic illustration of the SWI3D protein and its truncated versions. **B**, Leaf phenotype of 21-day-old seedlings. Scale bars, 1 cm. **C**, Western blot analysis using an anti-GFP antibody shows the accumulation of SWI3D protein and its truncated versions. For each plot, the antibody used is indicated on the left, and the sizes of the protein markers are indicated on the right. H3 serves as a loading control. **D**, Schematic illustration of the the N-terminal of SYD protein, SWI3D and the different truncated versions of SWI3D. **E**, Y2H assay to examine the direct interaction between SYD and SWI3D. Growth of transformed yeast on permissive  $SD^{-Ade-His-Leu-Trp}$  medium indicate interaction.

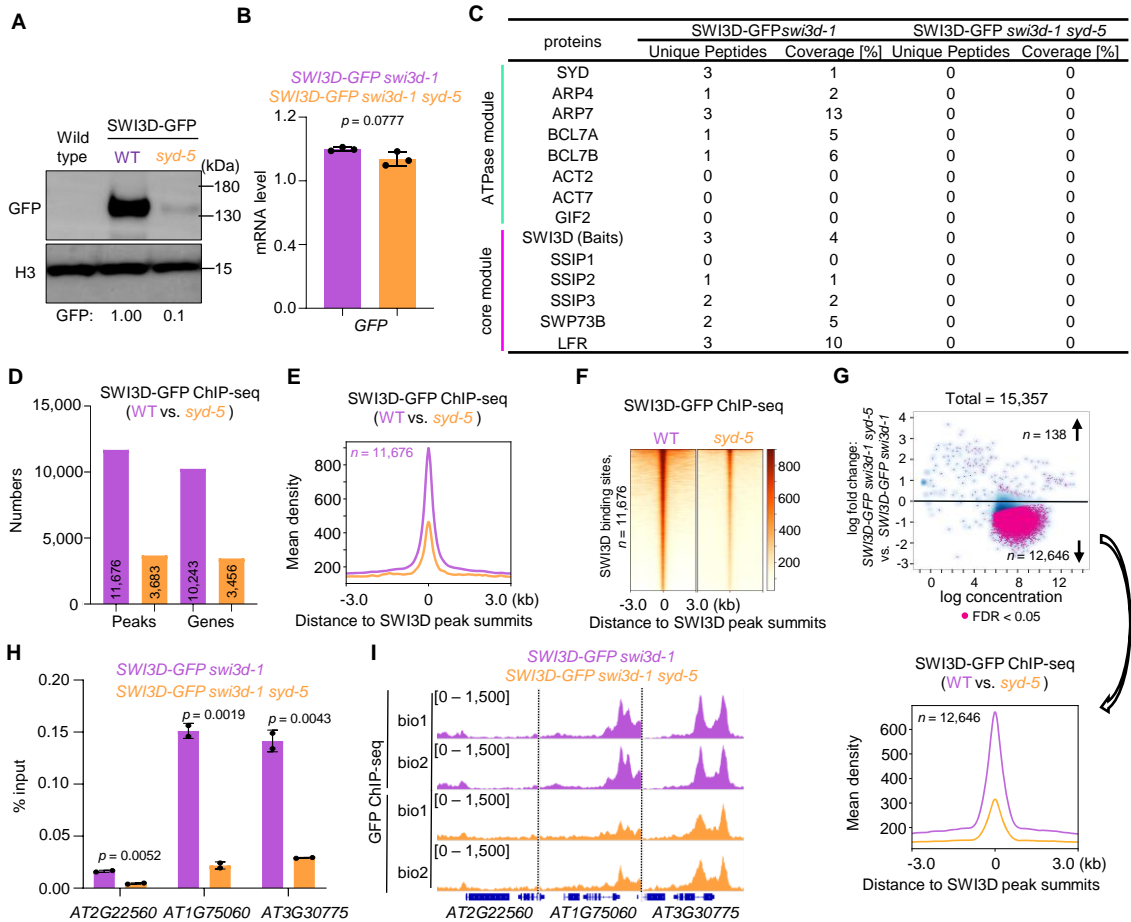

**Figure 7 The ATPase module is required for stability of the core module.** **A**, Immunoblot analysis showing the relative protein levels of SWI3D-GFP in WT and *syd-5* background. The numbers at the bottom represent amounts normalized to the loading control, histone H3. WT was used as a GFP-free control. **B**, The mRNA levels of SWI3D-GFP were determined by RT-qPCR in WT and *syd-5* background. *ACTIN2* was amplified as an internal control. Error bars are presented as mean values  $\pm$  s.d. from three biological replicates. **C**, Unique peptide numbers of SAS sub-complex subunits identified by IP-MS in SWI3D-GFP under WT and *syd-5* background. **D**, Number of SWI3D binding sites (number of peaks or genes) in the WT and *syd-5* background. **E** and **F**, Metagene plot (**E**) and heatmap (**F**) represented the mean density of SWI3D occupancy at all SWI3D-occupied sites in *syd-5* compared with WT. The average SWI3D binding signals within 3 kb genomic regions flanking SWI3D peak summits were shown. **G**, Fold change ( $\log_2$ ) in SWI3D occupancy between WT and *syd-5* background. Occupancy changes with false discovery rate (FDR) < 0.05 are highlighted. FDR values are multiple test-corrected Wilcoxon test *P* values, two biological replicates per ChIP. **H**, ChIP-qPCR validation of SWI3D occupancy at representative target genes using ChIP DNA samples independent from those used for ChIP-seq. The *AT2G22560* was used as the negative control. Error bars are presented as mean values  $\pm$  s.d. from two biological replicates. Unpaired, two-tailed Student's *t*-test. **I**, IGV views of SWI3D occupancy at selected loci in the WT and *syd-5* background. The y-axis scales represent shifted merged MACS2 tag counts for every 10 bp window.

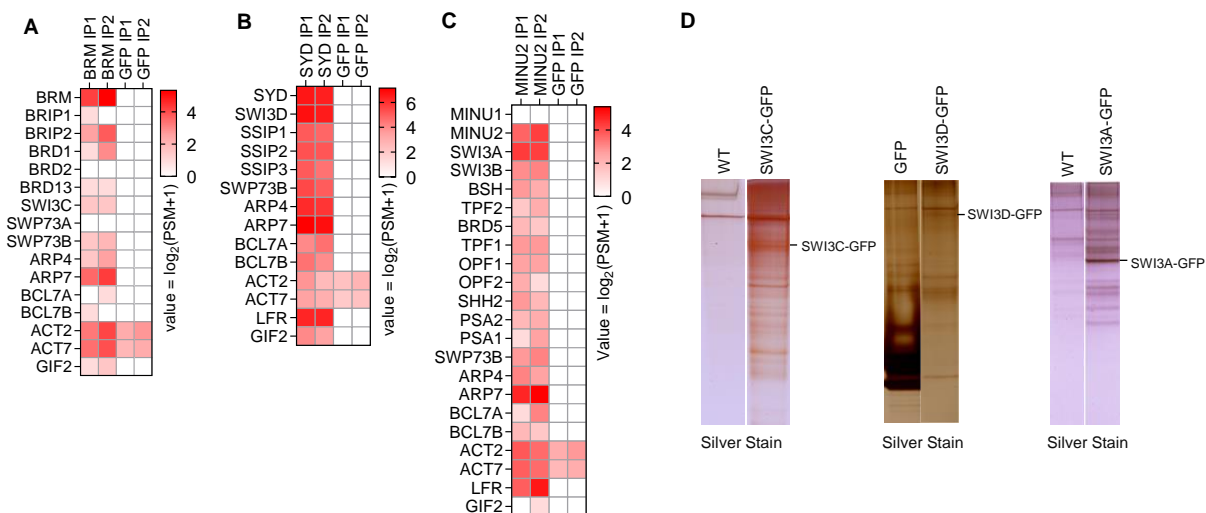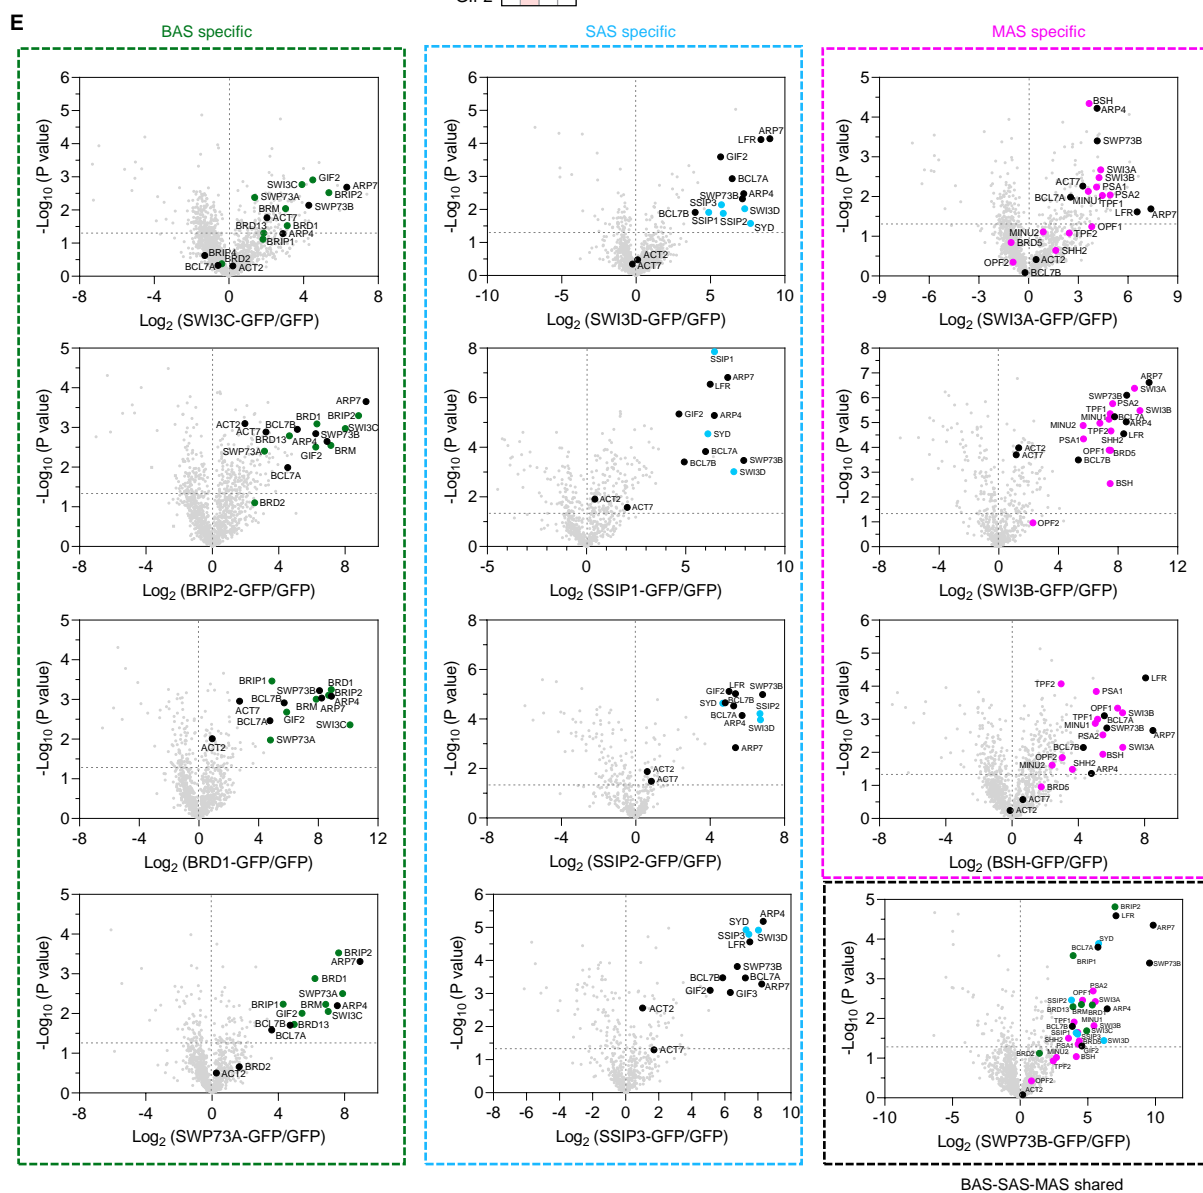



**Supplemental Figure 1 Immuno-purification of three distinct SWI/SNF sub-complexes in Arabidopsis.** **A-C**, Heatmaps showing the  $\log_2(\text{PSM}+1)$  values of SWI/SNF complex subunits identified by IP-MS in BRM, SYD and MINU2. **D**, Silver-stained gel of GFP immunoprecipitations from SWI3C-GFP, SWI3D-GFP and SWI3A-GFP. WT or *pACTIN2:GFP* were used as a control. **E**, Volcano plots displaying that SWI/SNF subunits are enriched in GFP immunoprecipitations from corresponding subunit from two or three independent experiments. *P* values were calculated by two-tailed Student's t-test. The pan-SWI/SNF subunit and complex specific subunits were shown in different colors.

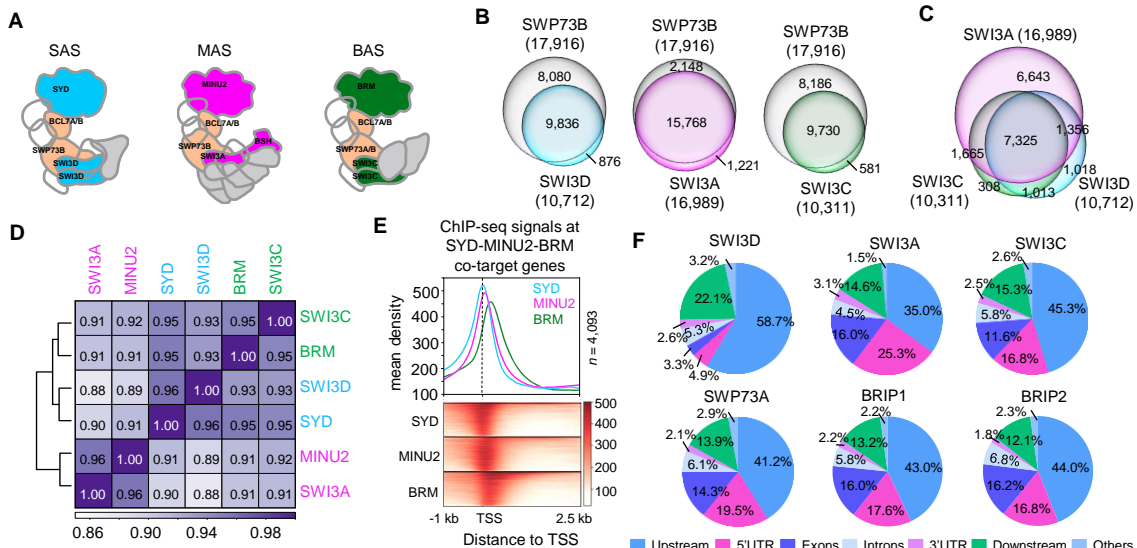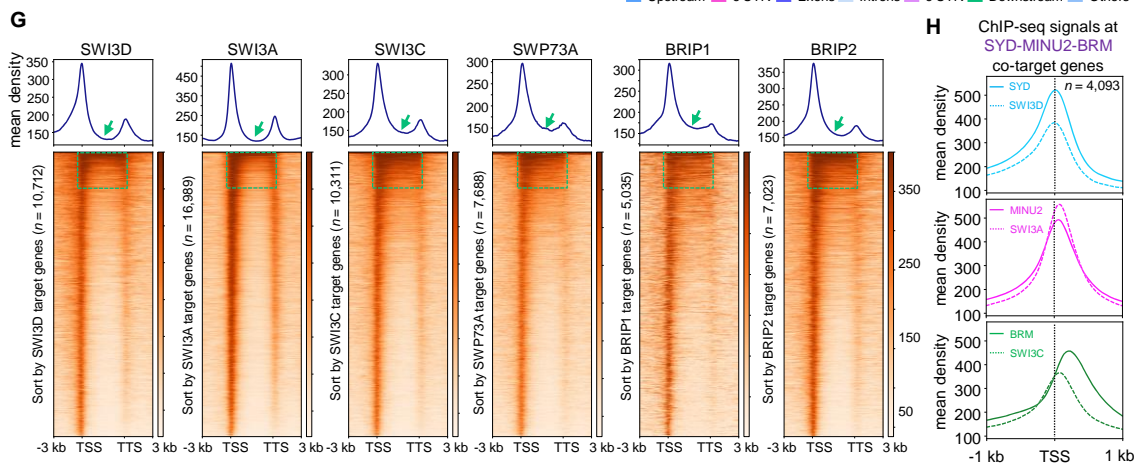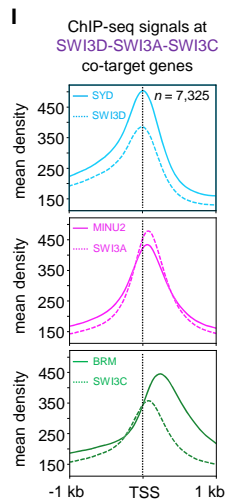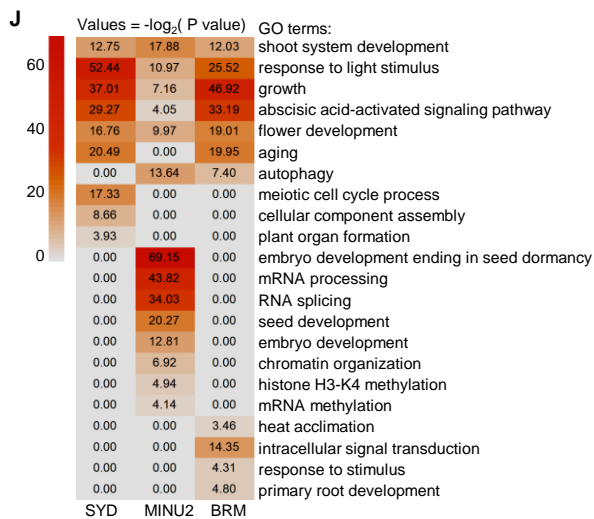

**Supplemental Figure 2 Differential binding of SAS, MAS and BAS sub-complexes on chromatin.**

**A**, Schematic of subunits selected for ChIP-seq: SYD and SWI3D (SAS-specific), MINU2, SWI3A and BSH (MAS-specific), BRM, SWI3C and SWP73A (BAS-specific) and SWP73B and BCL7A/B (pan-SWI/SNF) subunits. **B**, Venn diagrams displaying statistically significant overlaps among genes occupied by SWI3D, SWI3A or SWI3C with those by SWP73B. **C**, Venn diagrams displaying statistically significant overlaps among genes occupied by SWI3A, SWI3C and SWI3D. **D**, Matrix depicting spearman correlation coefficients between ChIP-seq datasets, calculated using the bin mode (bin size = 1,000). **E**, At the top, ChIP-seq read density distribution over the TSS and 2.5 kb into the gene body at their co-target genes. At the bottom, heatmap showing the mean occupancy signals of SYD, MINU2 and BRM. **F-G**, Pie charts (F), metagene plot (G) and heatmap (G) showing the distribution of SWI3A, SWI3C, SWI3D, SWP73A, BRIP1 and BRIP2 peaks at genic and intergenic regions in the genome. **H**, Metagene plot representations of the mean occupancy of SYD, SWI3D, MINU2, SWI3A, BRM and SWI3C at SYD-MINU2-BRM co-target genes. **I**, Metagene plot representations of the mean occupancy of SYD, SWI3D, MINU2, SWI3A, BRM and SWI3C at SWI3D-SWI3A-SWI3C co-target genes. **J**, Heatmap showing Gene ontology analysis of BRM, SYD and MINU2 targets genes.

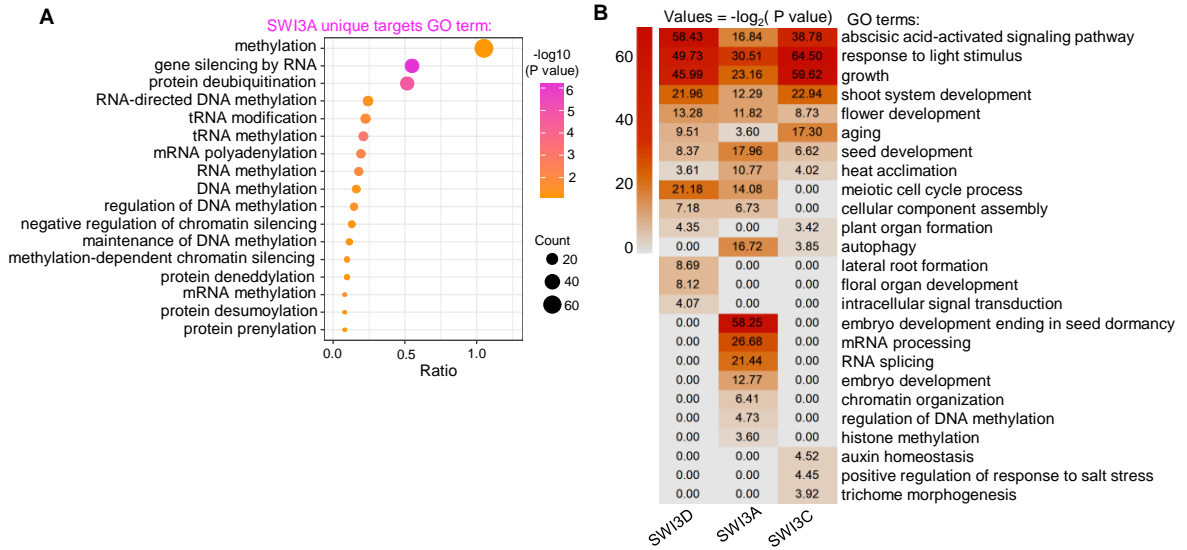

**Supplemental Figure 3 Unique target genes bound by SWI3A.** **A**, Gene ontology analysis of SWI3A unique target genes. **B**, Gene ontology analysis of SWI3A, SWI3C and SWI3D target genes.

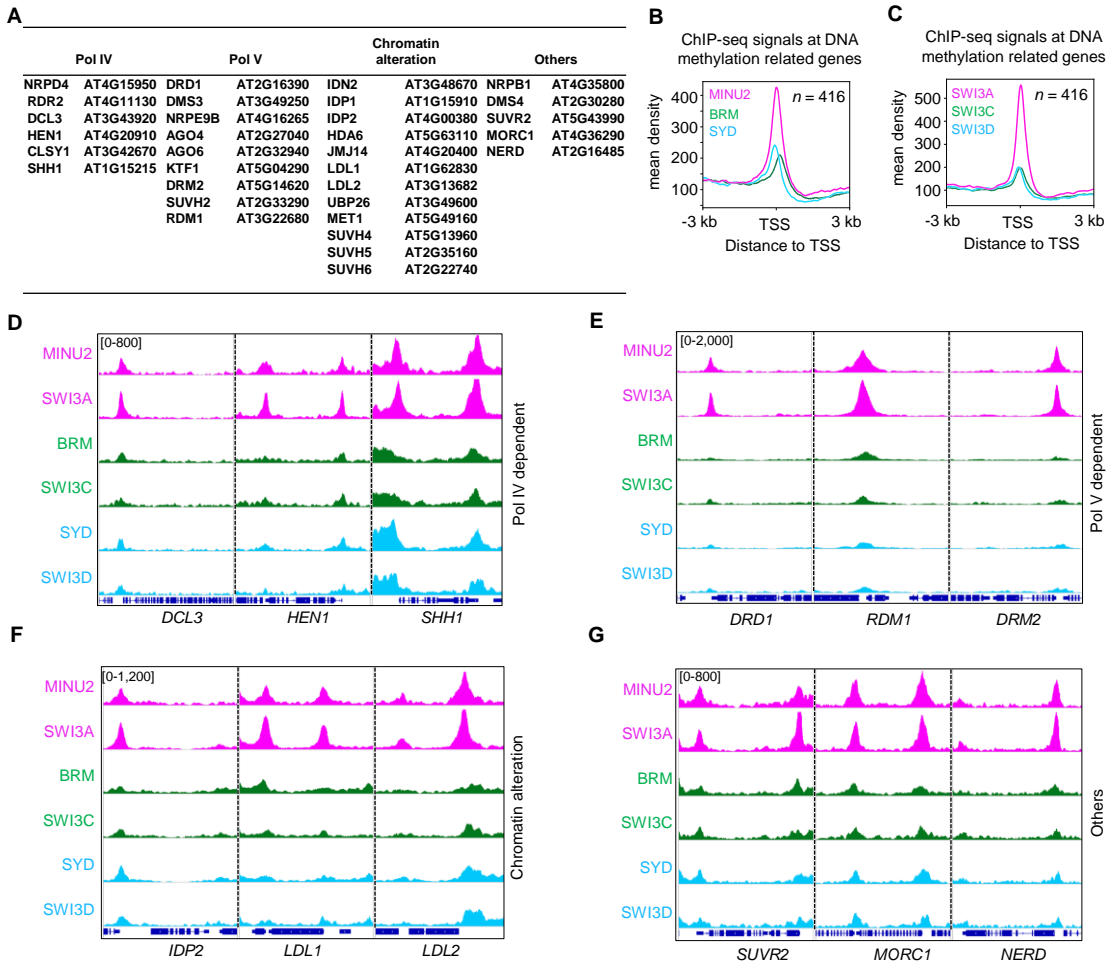

**Supplemental Figure 4 The MAS sub-complex showed a preference for binding to genes involved in the regulation of DNA methylation.** **A**, Partial list of MINU2 target genes related to DNA methylation. **B-C**, Metagene plots displaying the mean occupancy of MINU2, BRM and SYD at the 416 genes involved in the regulation of DNA methylation. The 416 genes list were obtained by searching the GO term “Methylation” at <http://geneontology.org/>. **D-G**, IGV views of ChIP-seq signals of MINU2, SWI3A, BRM, SWI3C, SYD and SWI3D at representative genes.

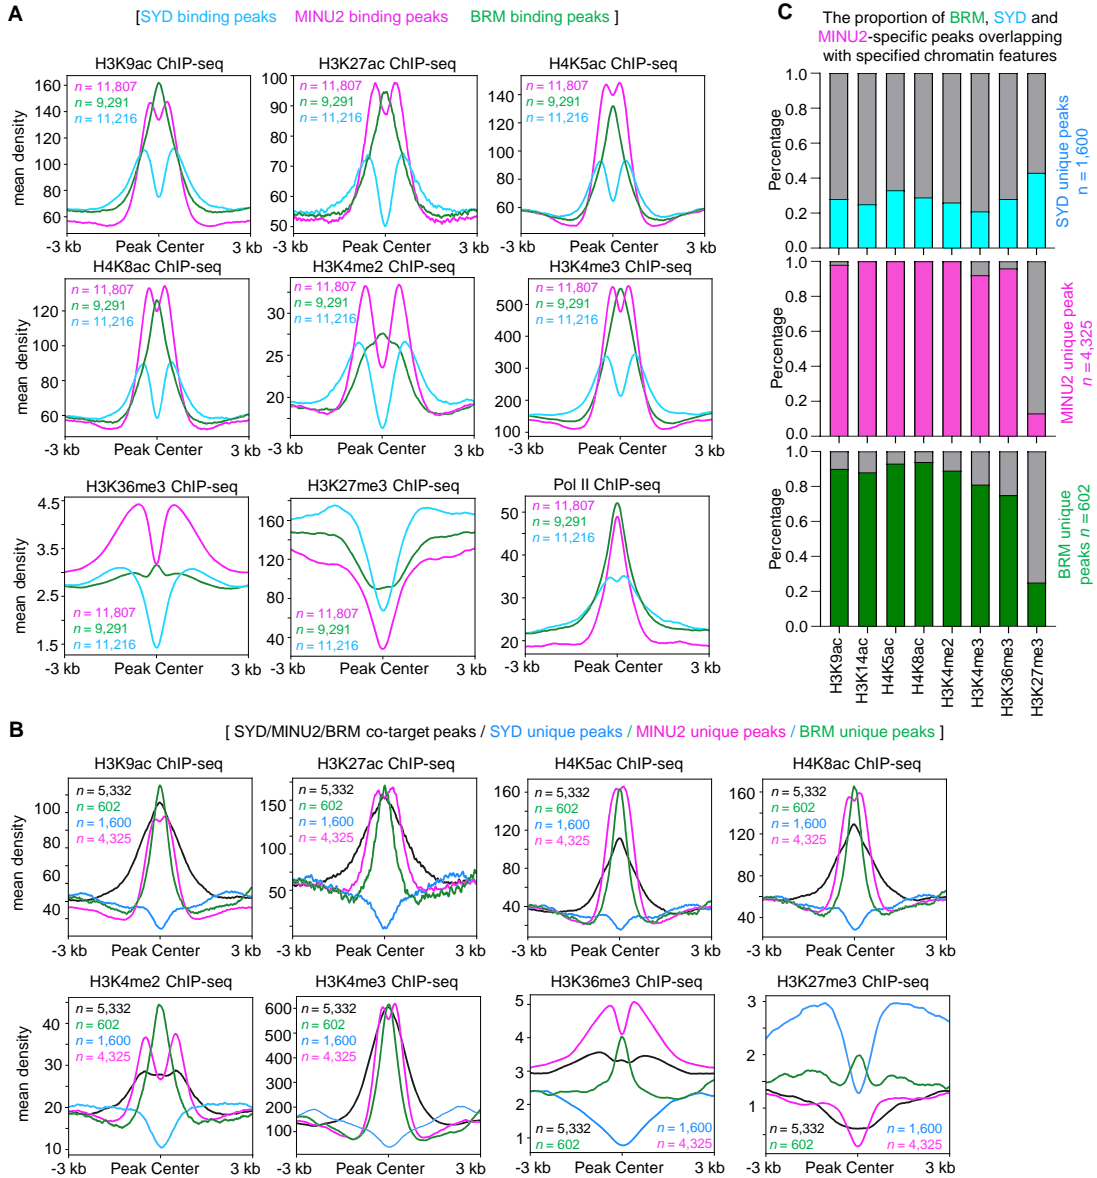

**Supplemental Figure 5 The MAS and BAS sub-complex, but not SAS sub-complex, show a significant overlap with activate histone modification markers. A, Metagene plots displaying the ChIP-seq signals of different histone modifications at SYD, MINU2 and BRM binding peaks. B, Metagene plots displaying the ChIP-seq signals of different histone modifications at SYD-MINU2-BRM co-binding and their specific binding peaks. C, Histogram reflecting proportion of SAS-, MAS-, and BAS- specific peaks overlapping with specified chromatin features.**

[ SWI3D binding peaks / SWI3A binding peaks / SWI3C binding peaks ]

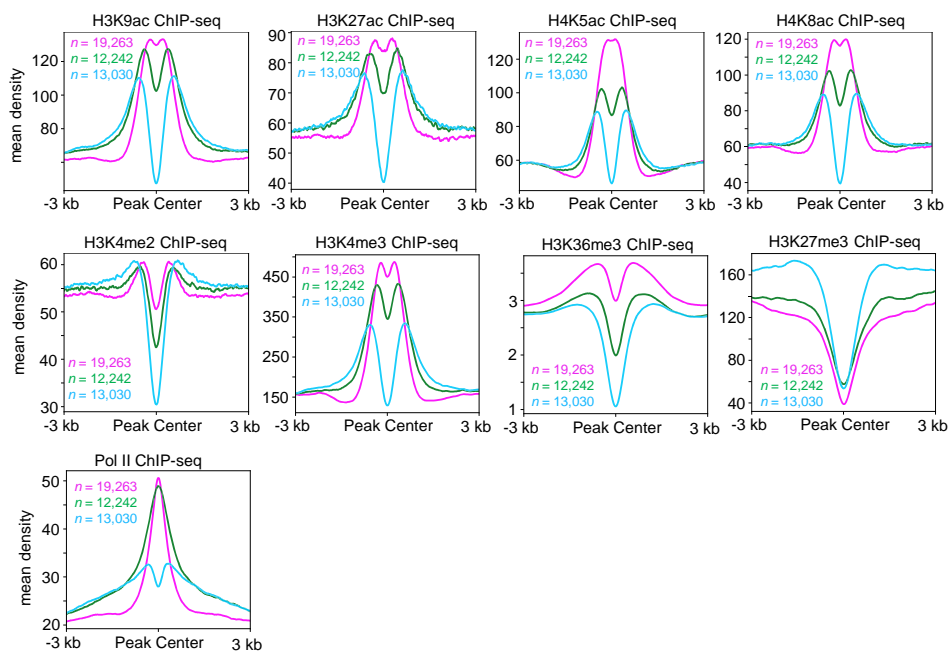

**Supplemental Figure 6 Metagenome plots displaying the ChIP-seq signals of different histone modifications at SWI3D, SWI3A and SWI3C binding peaks.**

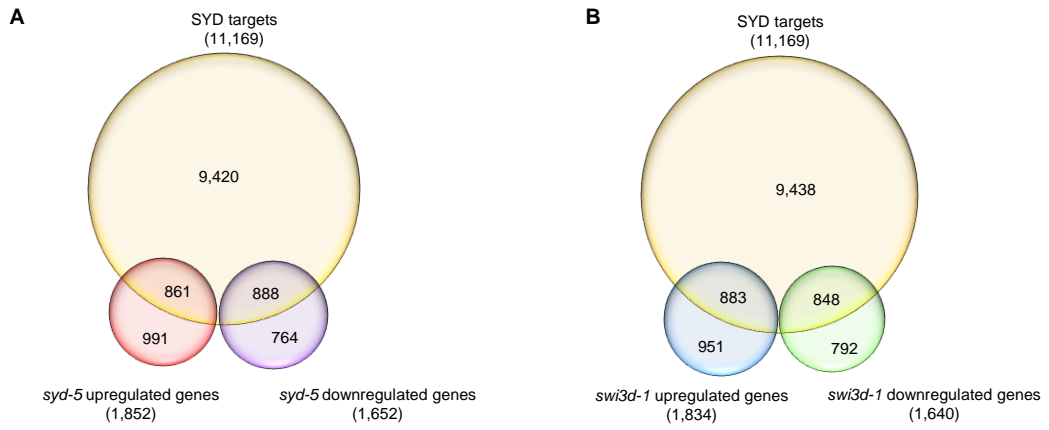

**Supplemental Figure 7 Analysis of the overlaps between SYD target genes and mis-regulated genes in *syd-5* or *swi3d-1*.** **A**, Venn diagrams displaying the overlap between the genes occupied by SYD and mis-regulated genes in *syd-5*. **B**, Venn diagrams displaying the overlap between the genes occupied by SYD and mis-regulated genes in *swi3d-1*.



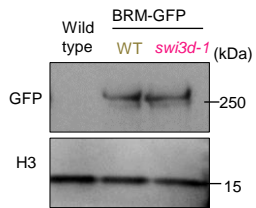

**Supplemental Figure 8 Loss of SWI3D did not affect BRM protein level.** Immunoblot analysis showing the relative protein levels of BRM-GFP in a WT and *swi3d-1* background. WT was used as a GFP-free control.

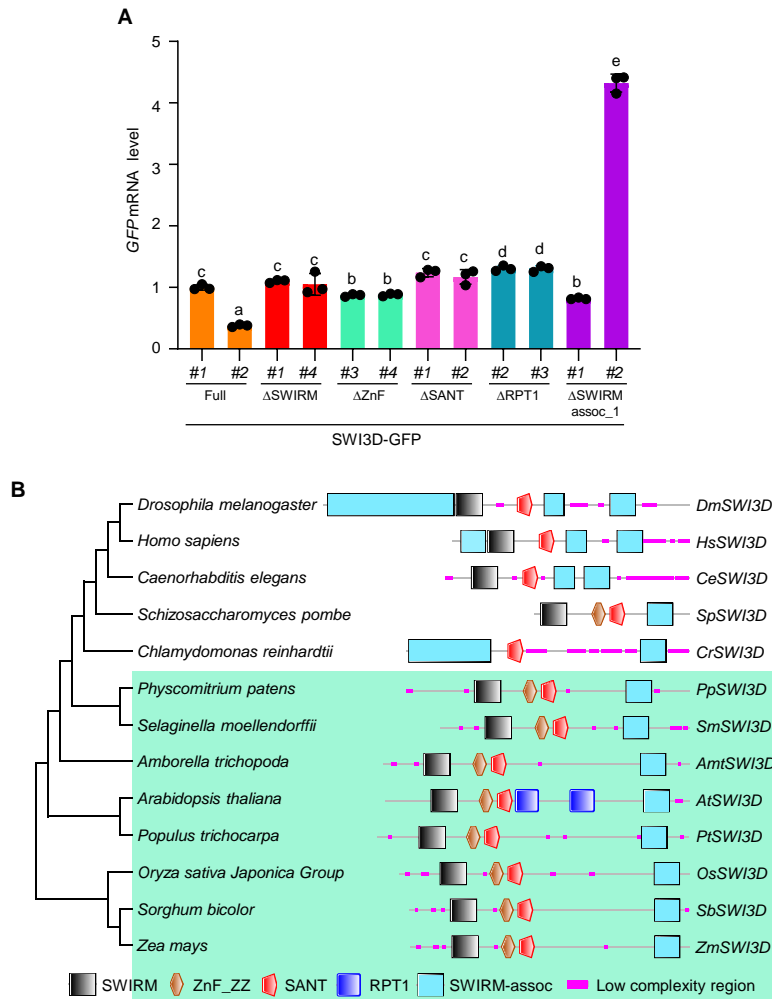

**Supplemental Figure 9 The SANT and SWIRM assoc-1 domain of SWI3D are conserved in eukaryotes.** **A**, The mRNA levels of *SWI3D-GFP* were determined by RT-qPCR in different truncated versions of SWI3D. *ACTIN2* was amplified as an internal control. Error bars are presented as mean values  $\pm$  s.d. from three biological replicates. Lowercase letters indicated significant differences between genetic backgrounds, as determined by the *post hoc* Tukey's HSD test. **B**, The phylogenetic tree and genes structure of SWI3D was constructed using the amino-acid sequences from different species, including *Amborella trichopoda*, *Physcomitrella patens*, *Arabidopsis thaliana*, *Oryza sativa Japonica*, *Zea mays*, *Homo sapiens*, *Drosophila melanogaster*, *Caenorhabditis elegans*, *Schizosaccharomyces pombe*, *Chlamydomonas reinhardtii*, *Selaginella moellendorffii*, *Populus trichocarpa*, *Sorghum bicolor*. The conserved domain were predicted at the online tool SMART: <https://smart.embl.de>.

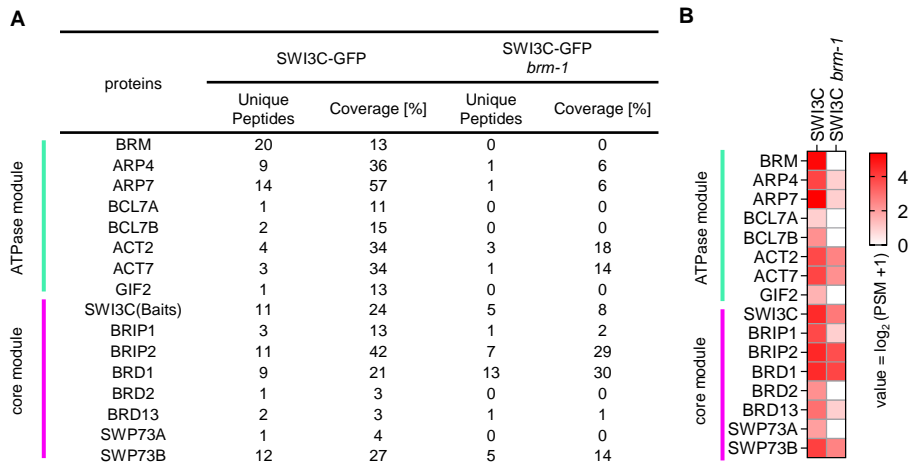

**Supplemental Figure 10 The ATPase of BAS sub-complex is essential to the stability of the core module. A**, Unique peptide numbers of BAS sub-complex subunits identified by IP-MS in *SWI3C-GFP* under WT and *brm-1* background. **B**, Heatmap showing the  $\log_2(\text{PSM} + 1)$  values of representative BAS sub-complex subunits identified by IP-MS in *SWI3C-GFP* under WT and *brm-1* background.

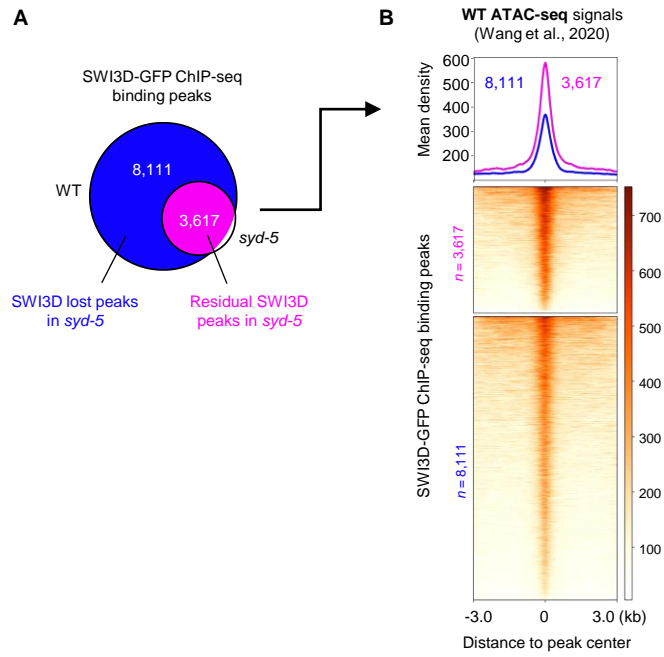

**Supplemental Figure 11 The residual peaks of SWI3D enriched at high chromatin accessibility regions.** **A**, Venn diagram displaying the overlap SWI3D peaks that lost and maintained in *syd-5* mutant background. **B**, Metagenome plot and heatmap representing the mean density of the ATAC-seq signals of WT at SWI3D peaks that lost and maintained in *syd-5*.

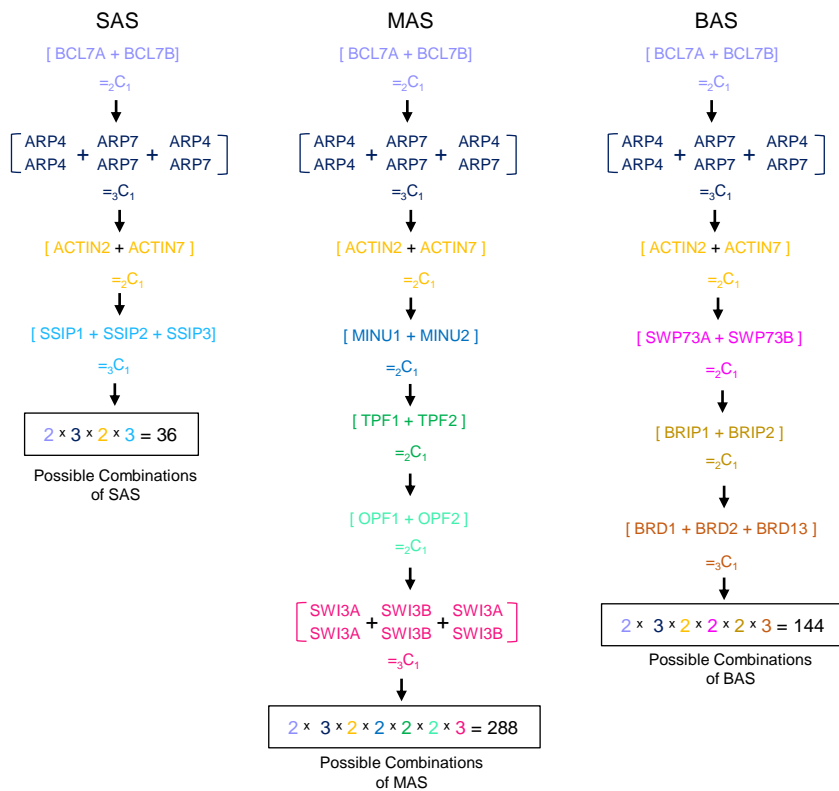

**Supplemental Figure 12 The possible combinations of the SAS, MAS and BAS sub-complexes.**

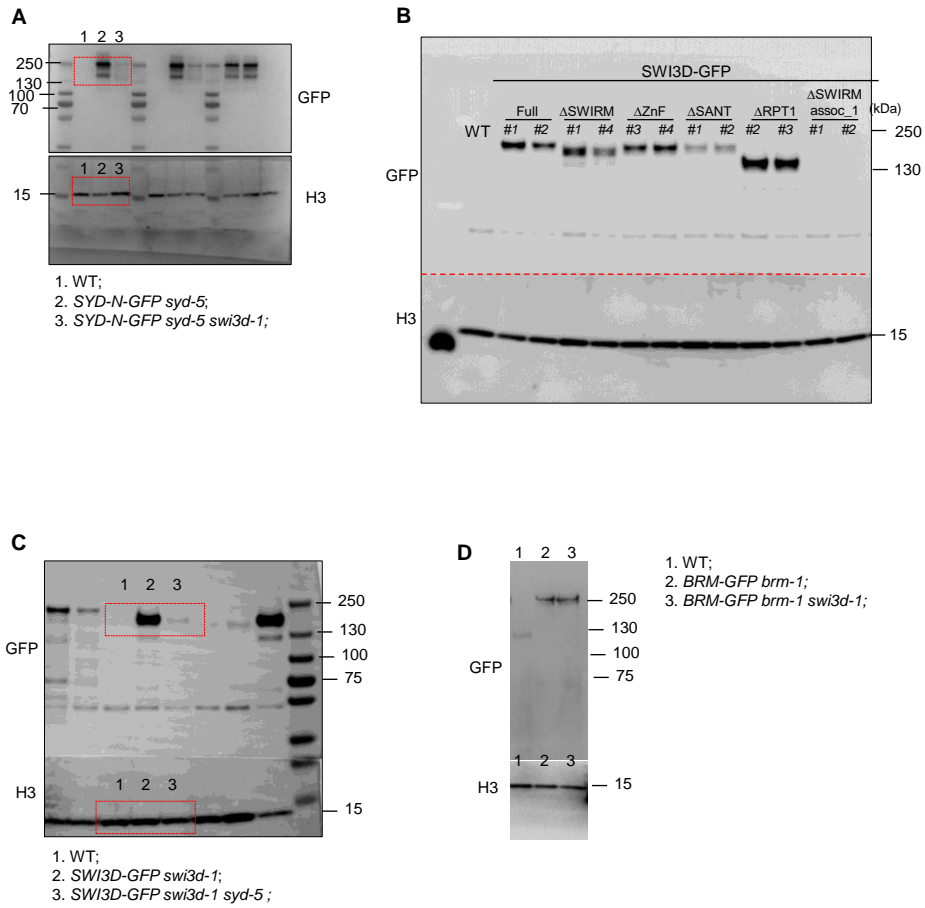

**Supplemental Figure 13 Gel source data.** A, Western blot related to Figure 5B. B, Western blot related to Figure 6. C, Western blot related to Figure 7A. D, Western blot related to Supplemental Figure 8.
